# Supplementary material for: Synthesis of nicotinimidamides via a tandem CuAAC/ring-cleavage /cyclization/oxidation four-component reaction and their cytotoxicity
Source: Royal Society of Chemistry journal article supplement (doi:10.1039/d4ra04918g), 2024-01-01

# Synthesis of nicotinimidamides via a tandem CuAAC/ring-cleavage /cyclization/oxidation four-component reaction and its cytotoxicity

Xi Chen <sup>1,#</sup>, Guanrong Li <sup>2,#</sup>, Zixin Huang <sup>2</sup>, Qiaoli Luo <sup>3</sup>, Tao Chen <sup>1,\*</sup> and Weiguang Yang <sup>2,\*</sup>

<sup>a</sup>Department of Hepatobiliary Surgery, Sun Yat-Sen Memorial Hospital, Sun Yat-Sen University, Guangzhou 510120, China; [chenx798@mail2.sysu.edu.cn](mailto:chenx798@mail2.sysu.edu.cn) (X.C.); [chentao@mail.sysu.edu.cn](mailto:chentao@mail.sysu.edu.cn) (T.C.)

<sup>b</sup>School of Ocean and Tropical Medicine, Guangdong Medical University, Zhanjiang, Guangdong, 524023, China; [lgr971005@163.com](mailto:lgr971005@163.com) (G.L.); [1733687714@qq.com](mailto:1733687714@qq.com) (Z.H.); [09ywg@163.com](mailto:09ywg@163.com) (W.Y.);

<sup>c</sup>School of Chemistry and Chemical Engineering, Lingnan Normal University, Zhanjiang 524048, P. R. China; [luoql@lingnan.edu.cn](mailto:luoql@lingnan.edu.cn)

# These authors contributed equally to this work

\*Correspondence: [chentao@mail.sysu.edu.cn](mailto:chentao@mail.sysu.edu.cn) (T.C.); [09ywg@163.com](mailto:09ywg@163.com) (W.Y.).

## Table of Contents

|                                                                                            |    |
|--------------------------------------------------------------------------------------------|----|
| 1. General Information.....                                                                | S2 |
| 2. The structures of starting materials <b>1a-1p</b> , <b>2a-2d</b> and <b>3a-3e</b> ..... | S3 |
| 3. Copies of NMR Spectra.....                                                              | S4 |

## 1. General Information

All melting points were determined on a Yanaco melting point apparatus (Kyoto, Japan) and were uncorrected. IR spectra were recorded as KBr pellets on a Nicolet FT-IR 5DX spectrometer (Waltham, MA, USA). All spectra of  $^1\text{H}$  NMR (400 MHz) and  $^{13}\text{C}$  NMR (100 MHz) were recorded on a Bruker AVANCE NEO 400 MHz spectrometer (Berne, Switzerland) in  $\text{DMSO-}d_6$  or  $\text{CDCl}_3$  (unless otherwise indicated), with TMS used as an internal reference and the J values given in Hz. HRMS were obtained on a Thermo Scientific Q Exactive Focus Orbitrap LC-MS/MS spectrometer (Waltham, MA, USA). Optical rotations are measured on a P-2000, serial number: B209161232, JASCO corporation (Tokyo, Japan).

## 2. The structures of starting materials 1a-1p, 2a-2c and 3a-3j

Scheme S1 Structures of the starting materials 1a-1p.

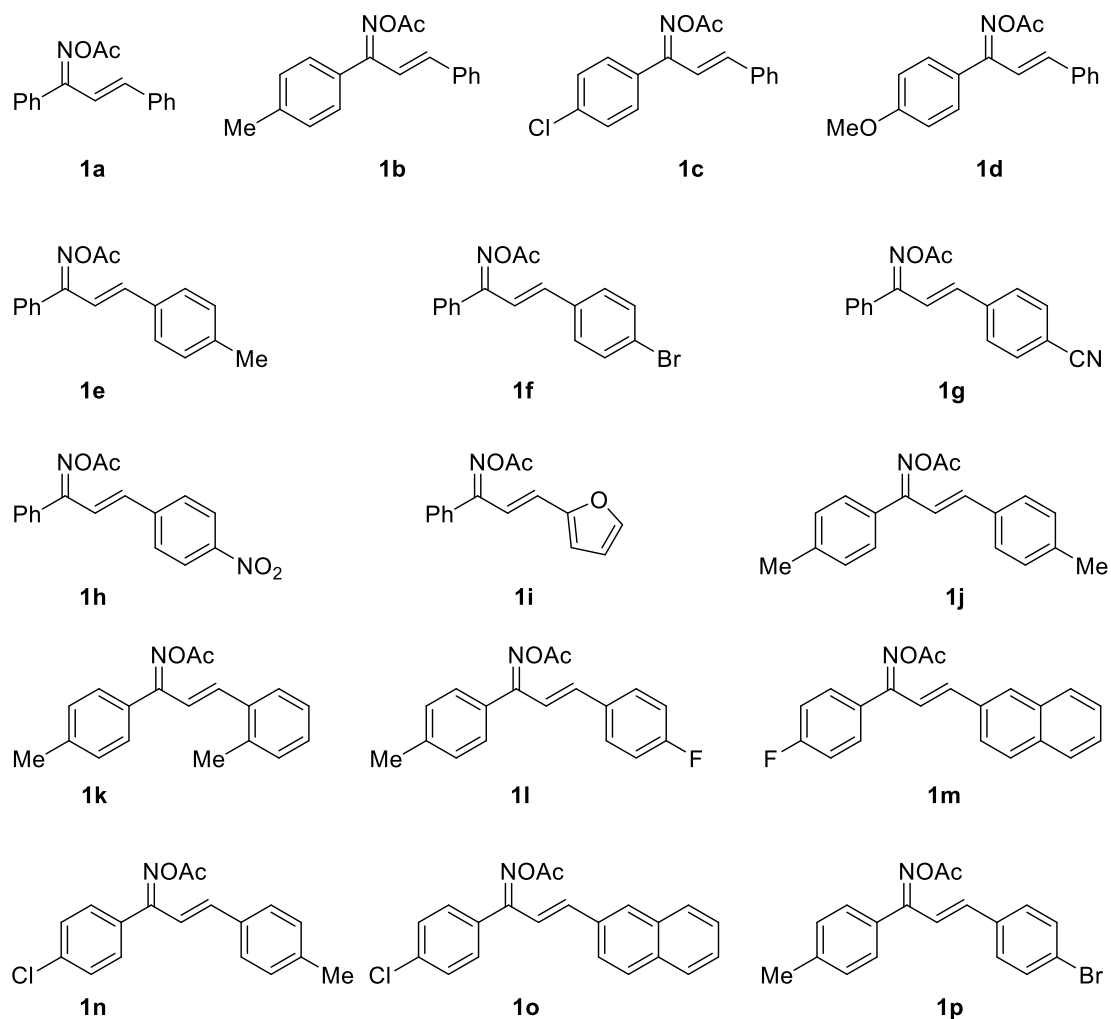

Scheme S2 Structures of the starting materials 2a-2d.

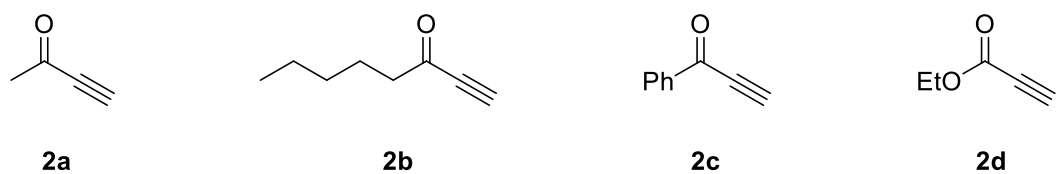

Scheme S3 Structures of the starting materials 3a-3e.

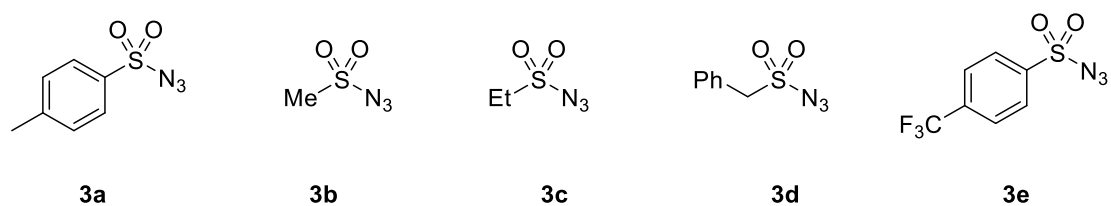

### 3. Copies of NMR spectra

Figure S1.  $^1\text{H}$  NMR of **5a** (400 MHz,  $\text{DMSO-}d_6$ ) and  $^{13}\text{C}$  NMR of **5a** (100 MHz,  $\text{DMSO-}d_6$ ).

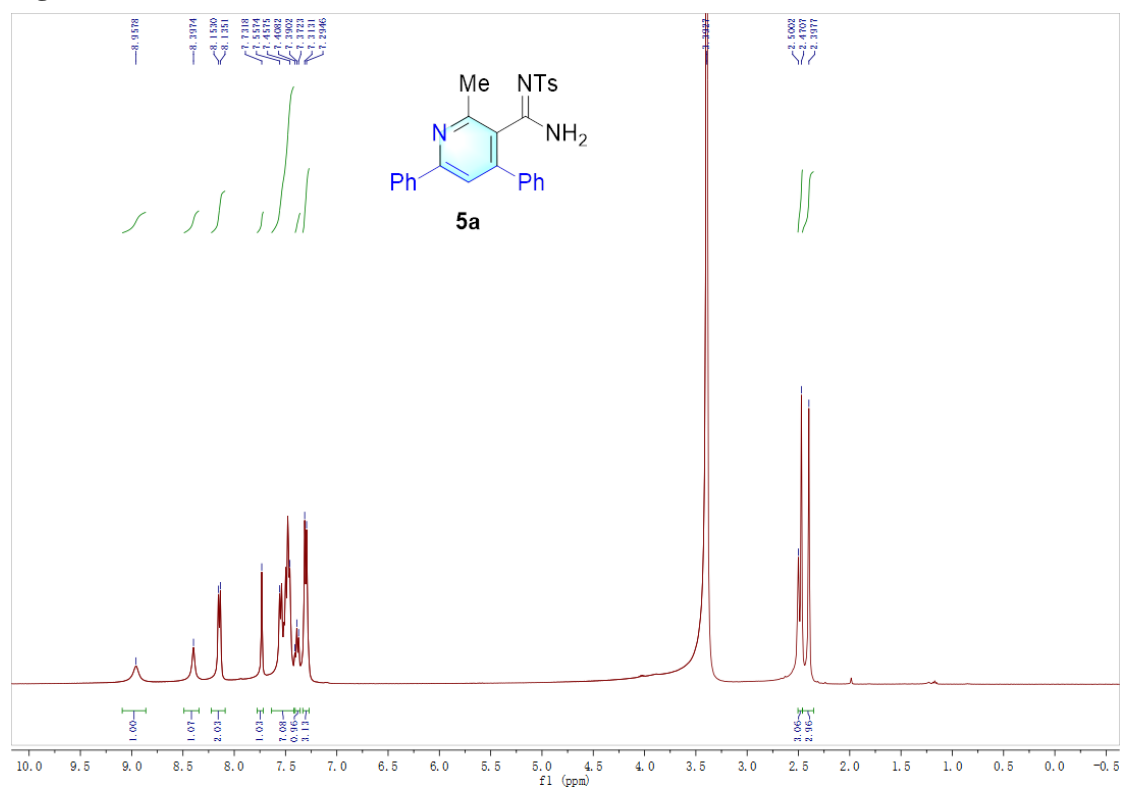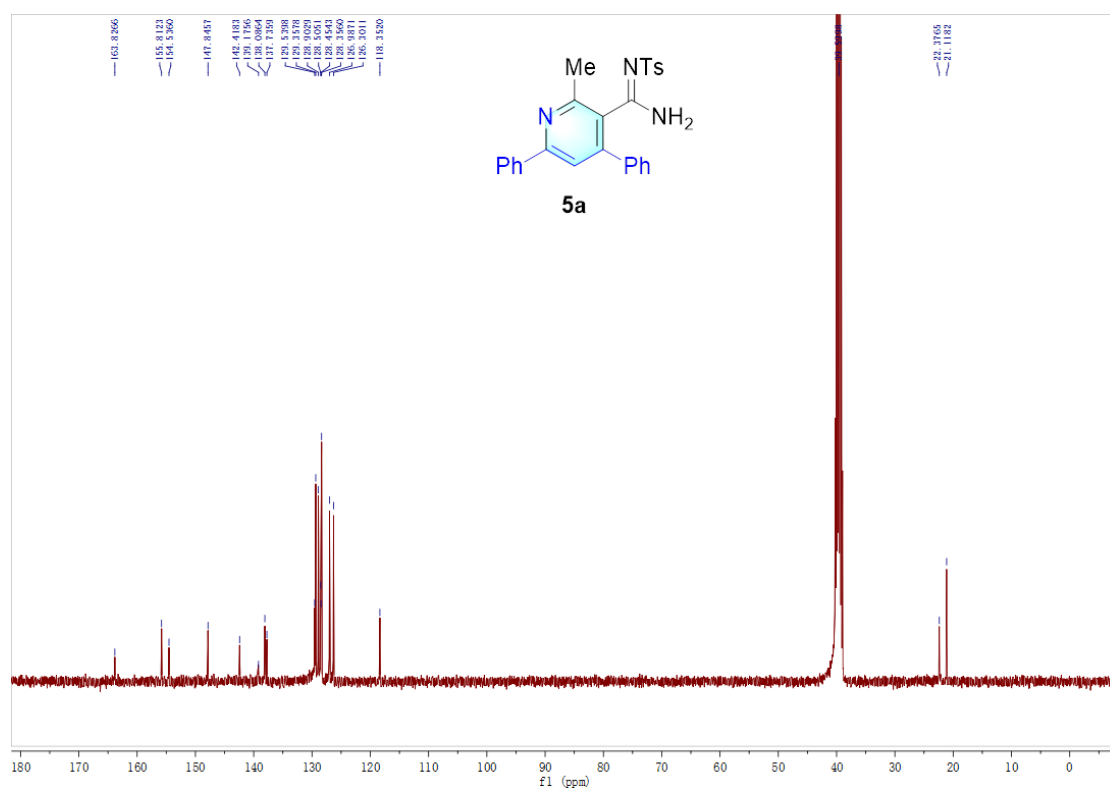

**Figure S2.**  $^1\text{H}$  NMR of **5b** (400 MHz,  $\text{DMSO-}d_6$ ) and  $^{13}\text{C}$  NMR of **5b** (100 MHz,  $\text{DMSO-}d_6$ ).

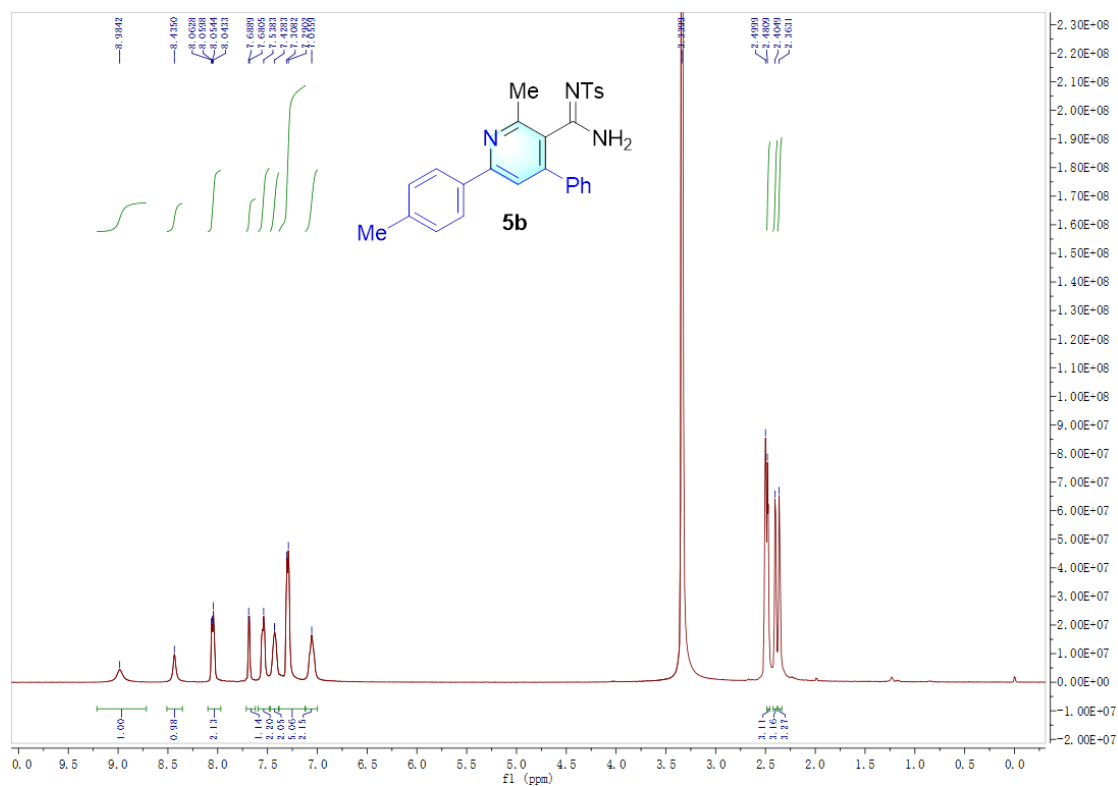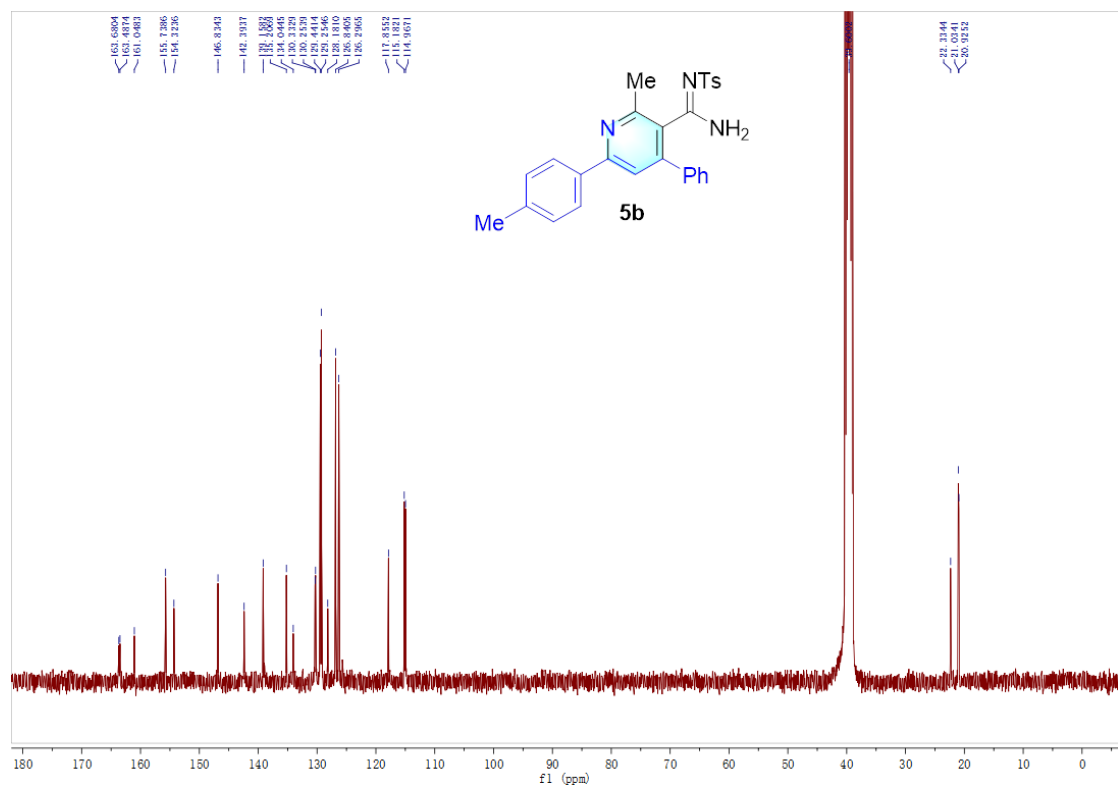



**Figure S4.**  $^1\text{H}$  NMR of **5d** (400 MHz,  $\text{DMSO-}d_6$ ) and  $^{13}\text{C}$  NMR of **5d** (100 MHz,  $\text{DMSO-}d_6$ ).

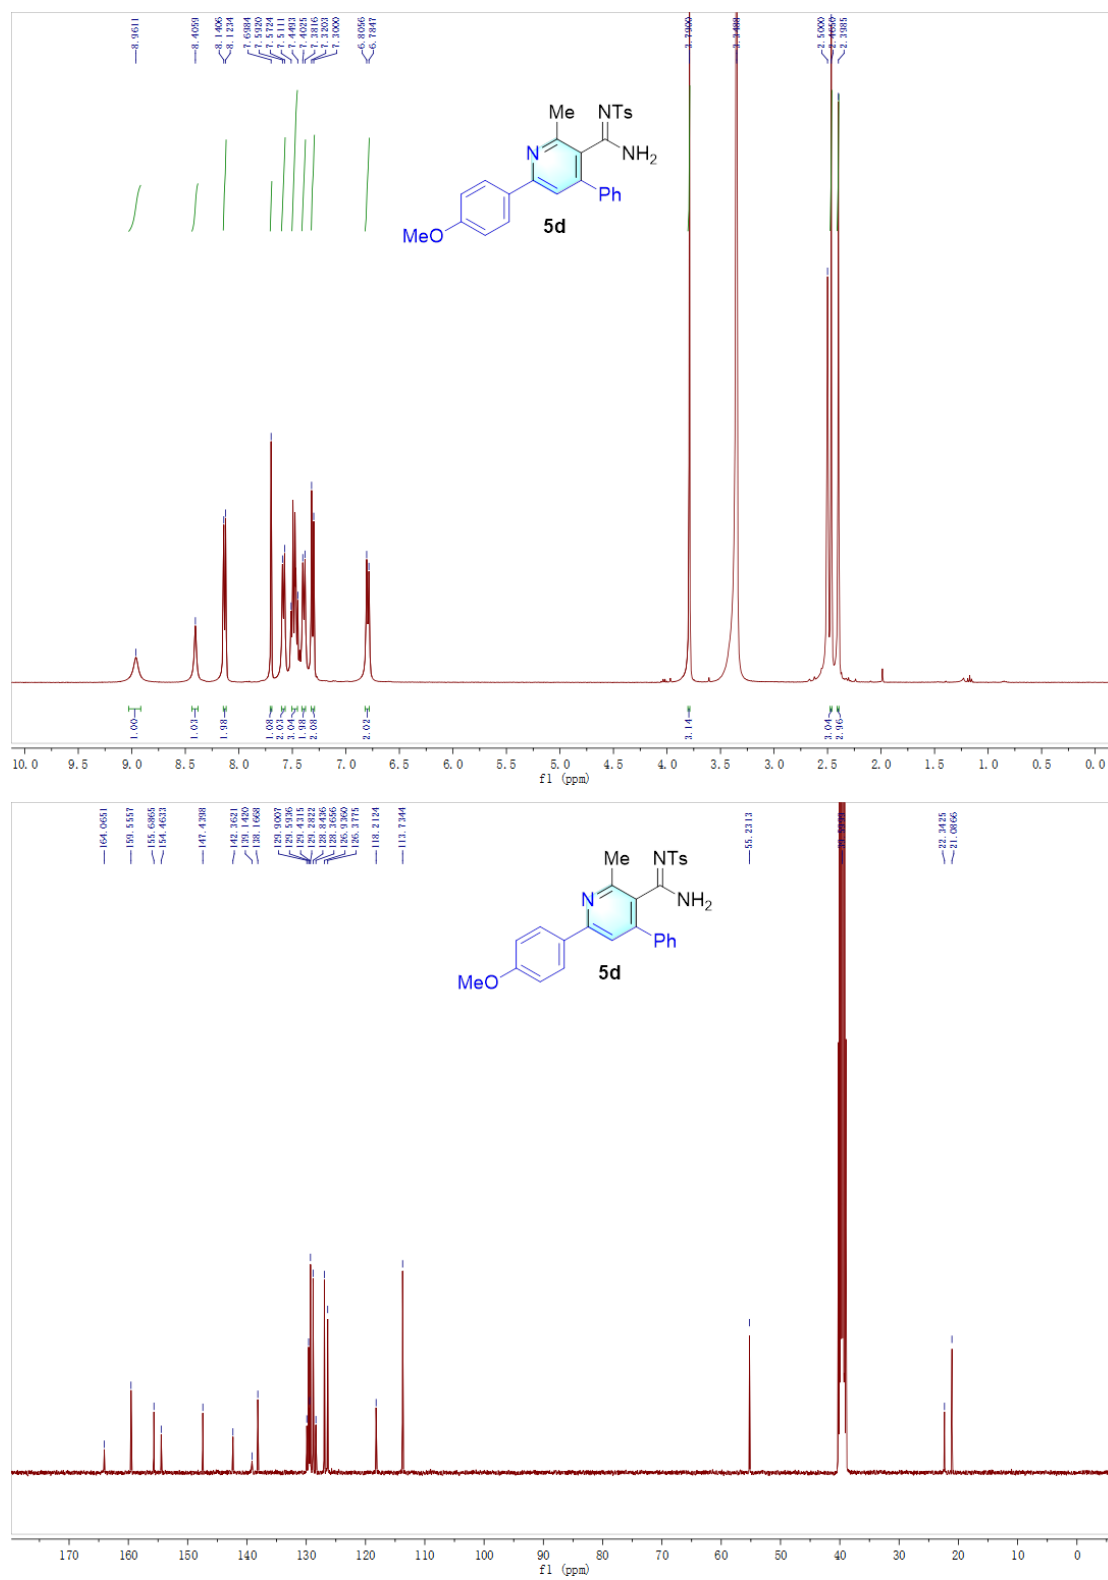

**Figure S5.**  $^1\text{H}$  NMR of **5e** (400 MHz,  $\text{DMSO-}d_6$ ) and  $^{13}\text{C}$  NMR of **5e** (100 MHz,  $\text{DMSO-}d_6$ ).

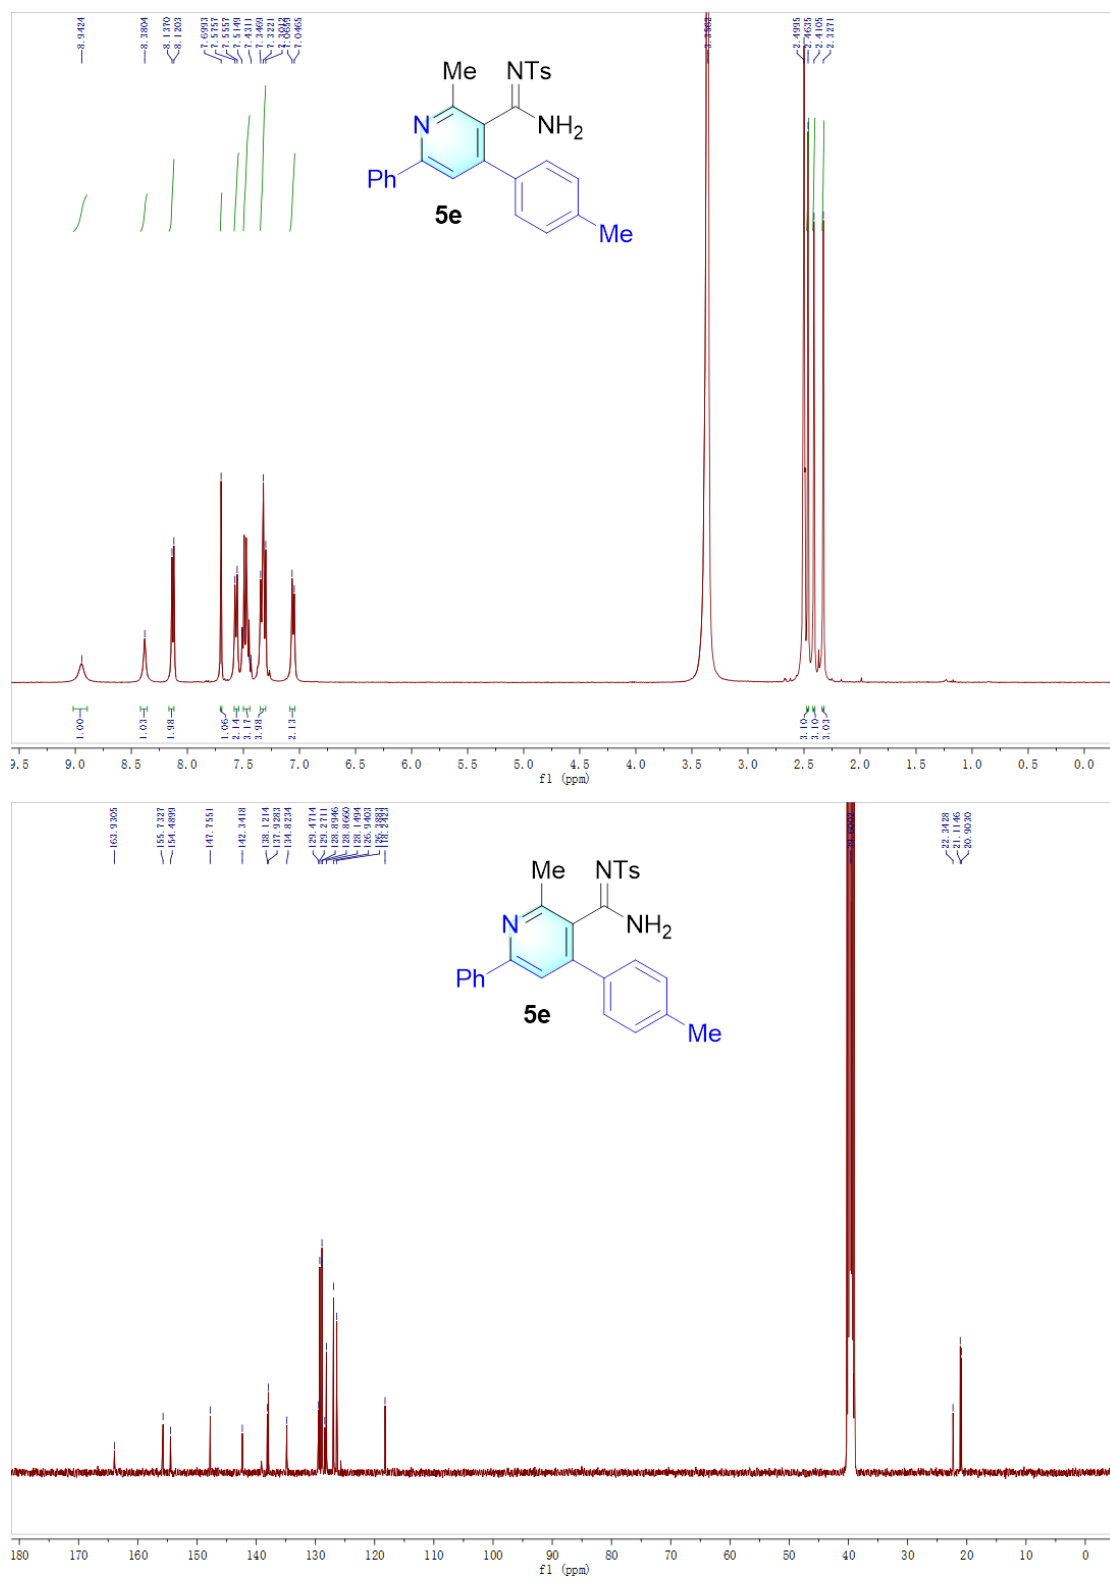



Figure S6.  $^1\text{H}$  NMR of **5f** (400 MHz,  $\text{DMSO-}d_6$ ) and  $^{13}\text{C}$  NMR of **5f** (100 MHz,  $\text{DMSO-}d_6$ ).

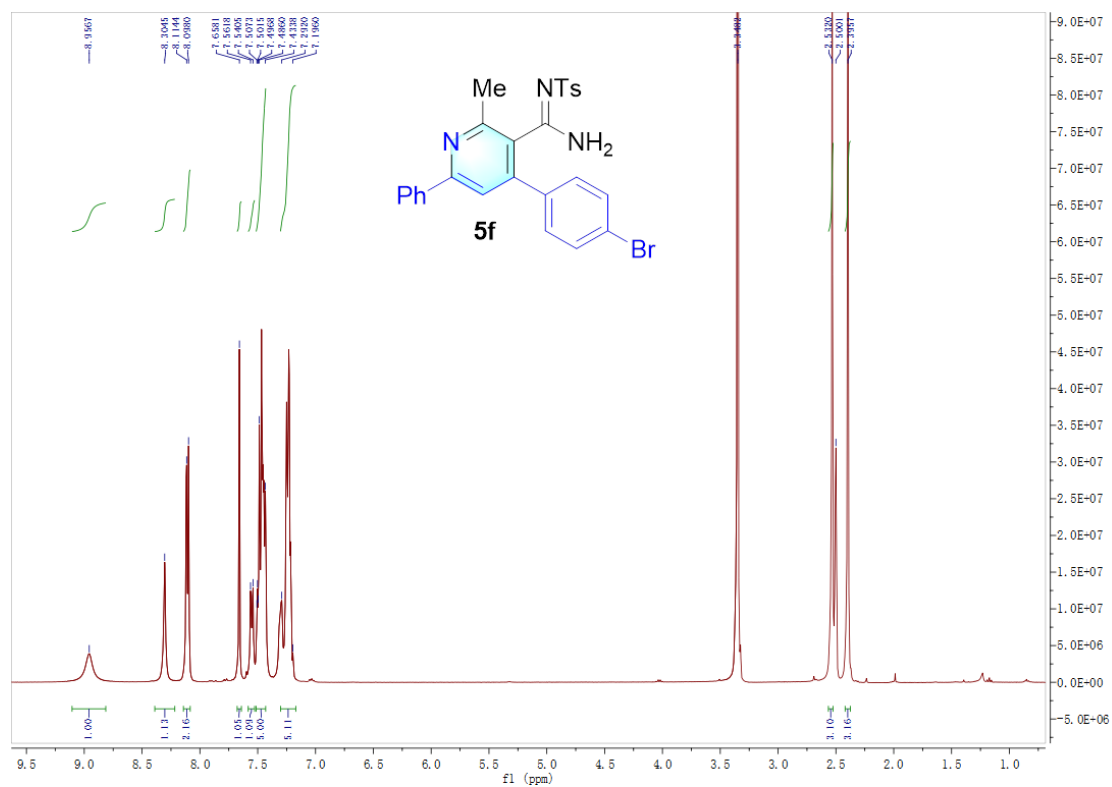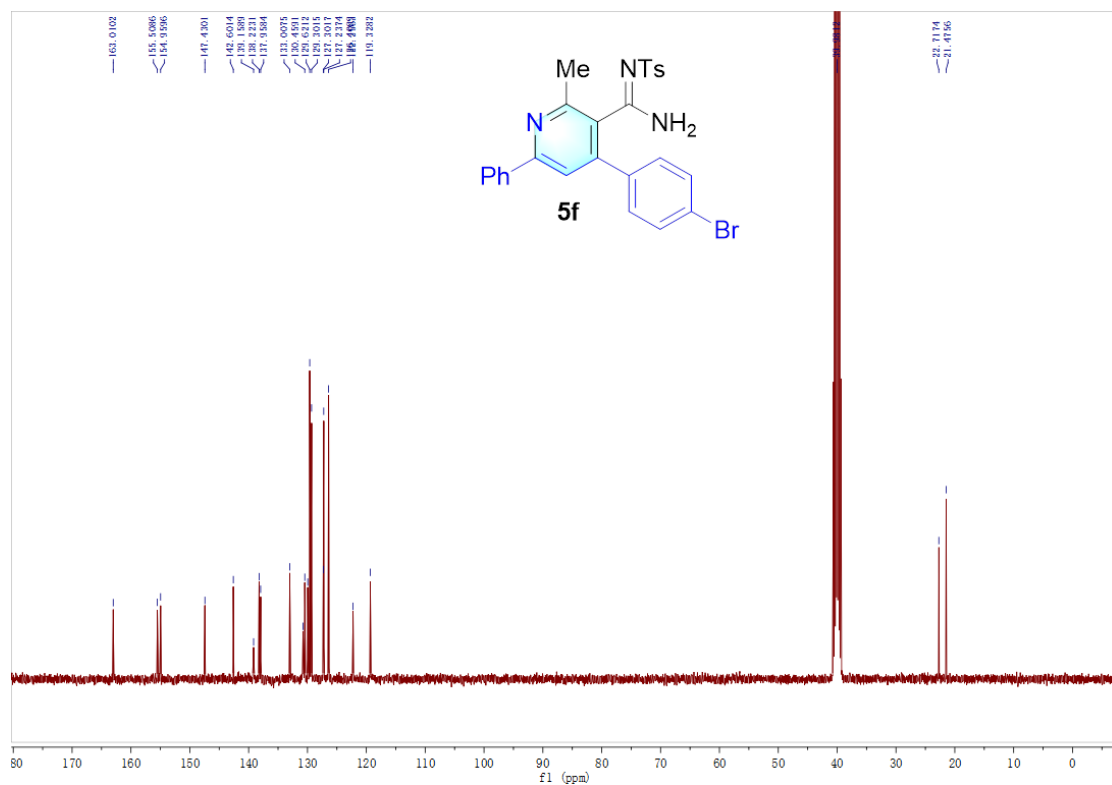

**Figure S7.**  $^1\text{H}$  NMR of **5g** (400 MHz,  $\text{DMSO-}d_6$ ) and  $^{13}\text{C}$  NMR of **5g** (100 MHz,  $\text{DMSO-}d_6$ ).

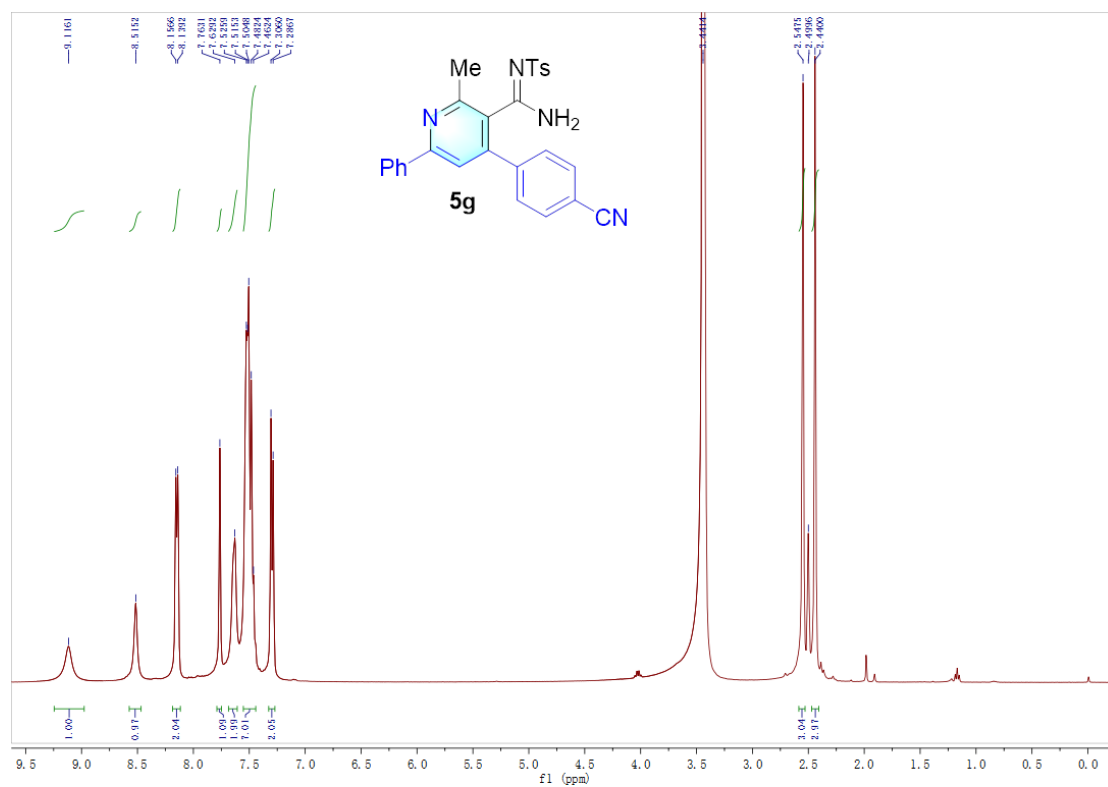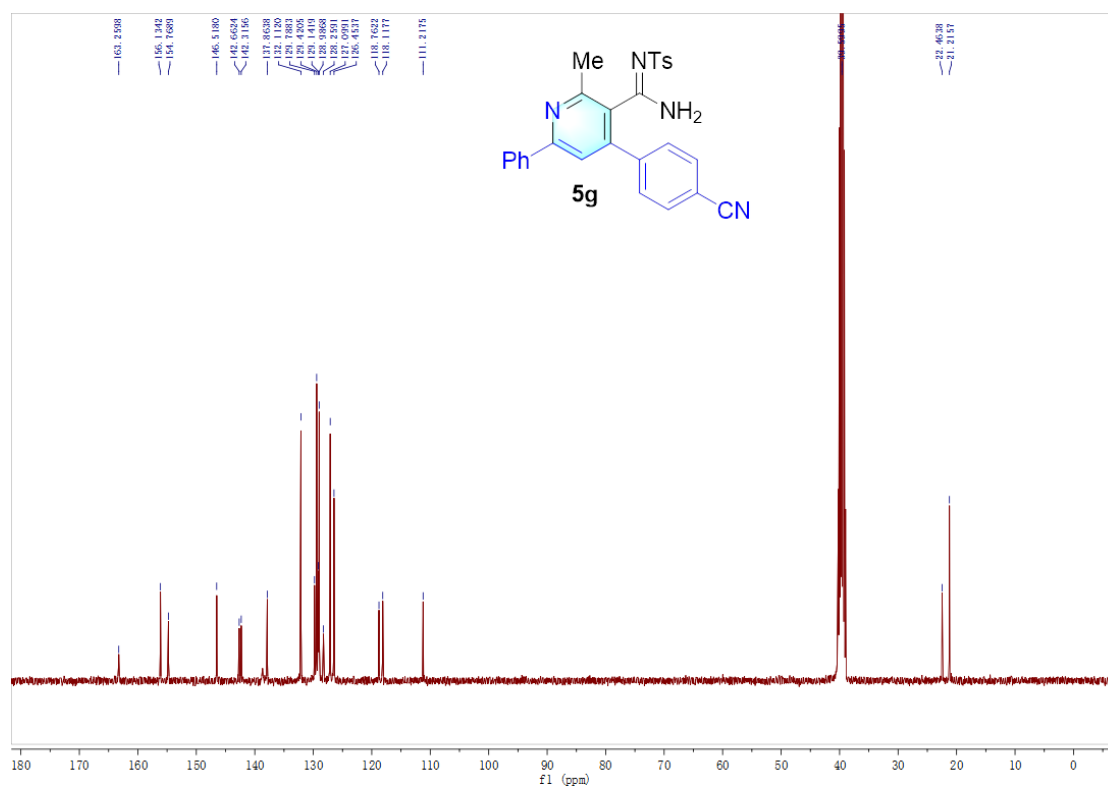

**Figure S8.**  $^1\text{H}$  NMR of **5h** (400 MHz,  $\text{DMSO-}d_6$ ) and  $^{13}\text{C}$  NMR of **5h** (100 MHz,  $\text{DMSO-}d_6$ ).

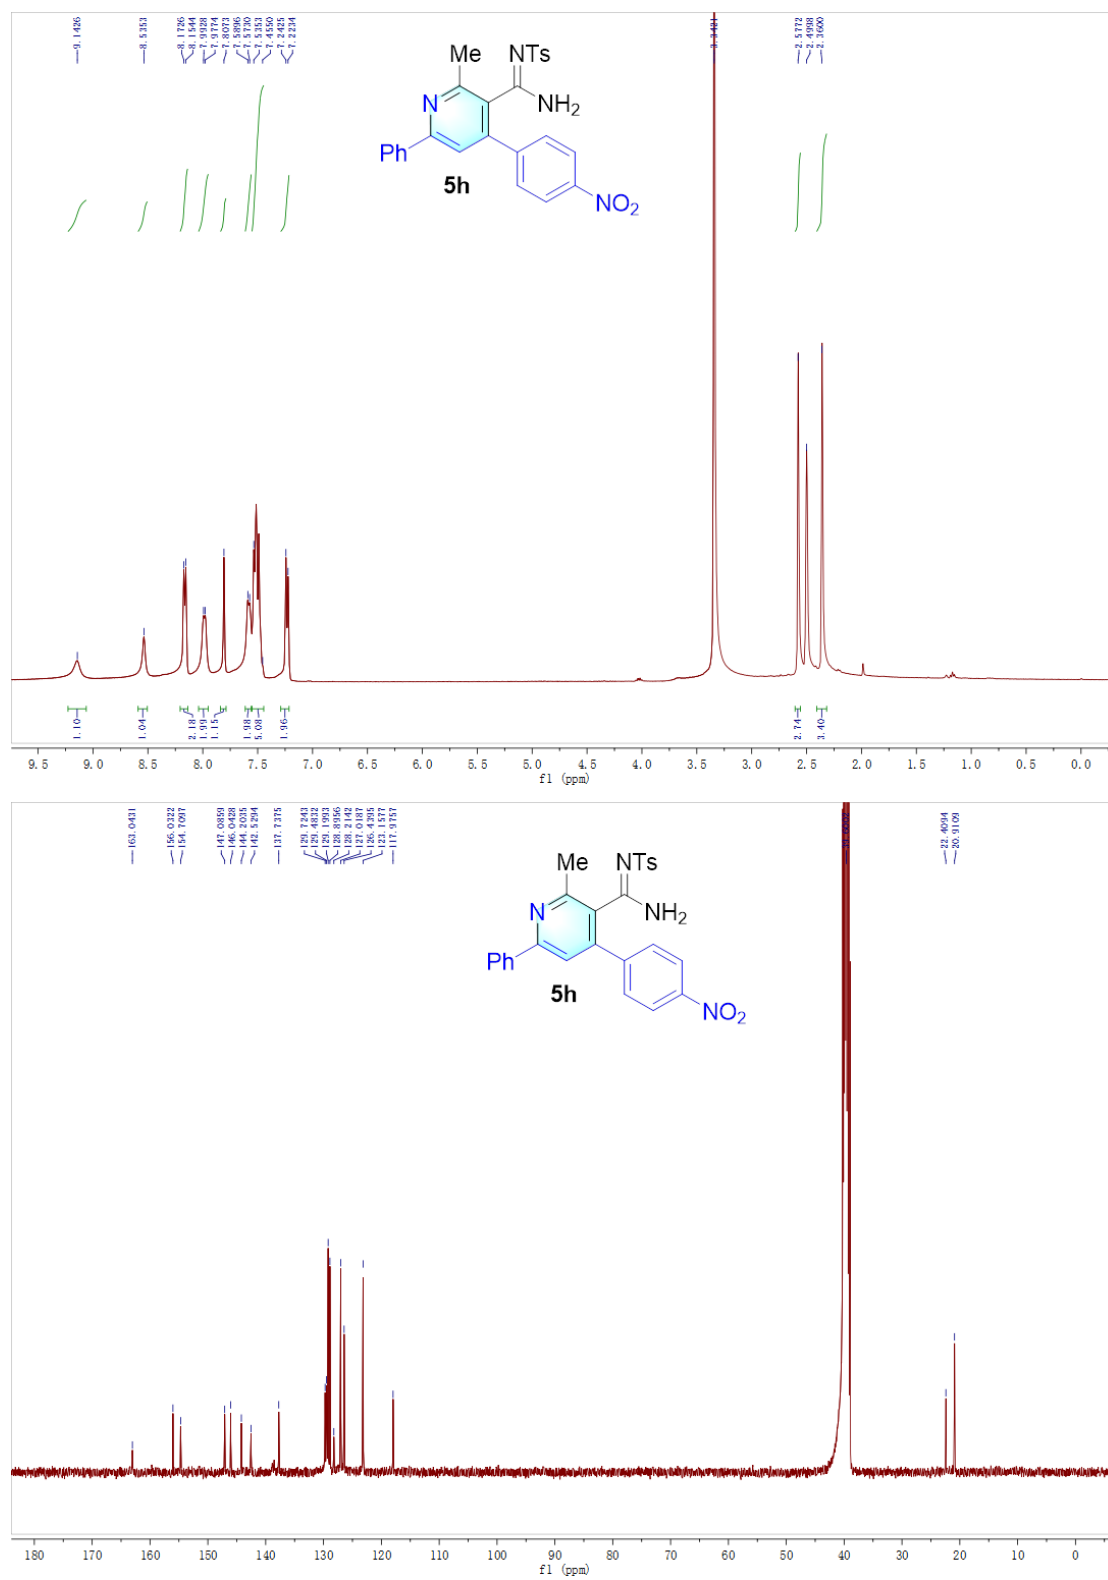

**Figure S9.**  $^1\text{H}$  NMR of **5i** (400 MHz,  $\text{DMSO-}d_6$ ) and  $^{13}\text{C}$  NMR of **5i** (100 MHz,  $\text{DMSO-}d_6$ ).

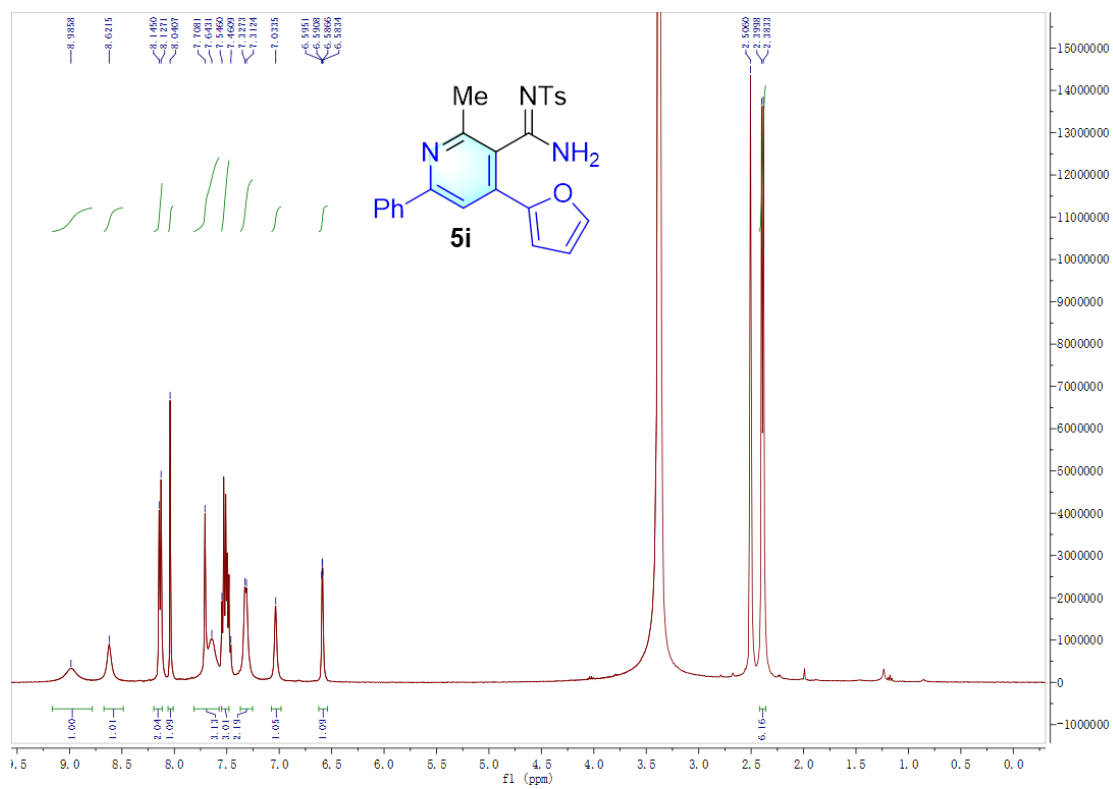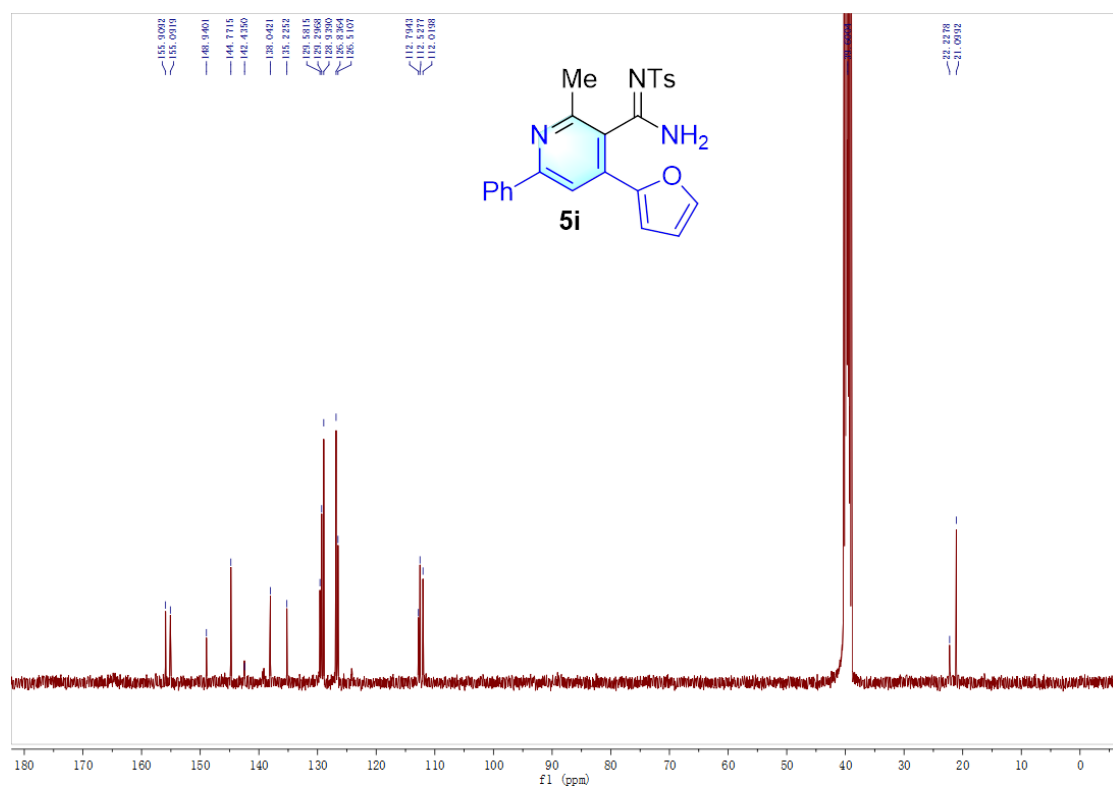

**Figure S10.**  $^1\text{H}$  NMR of **5j** (400 MHz,  $\text{DMSO-}d_6$ ) and  $^{13}\text{C}$  NMR of **5j** (100 MHz,  $\text{DMSO-}d_6$ ).

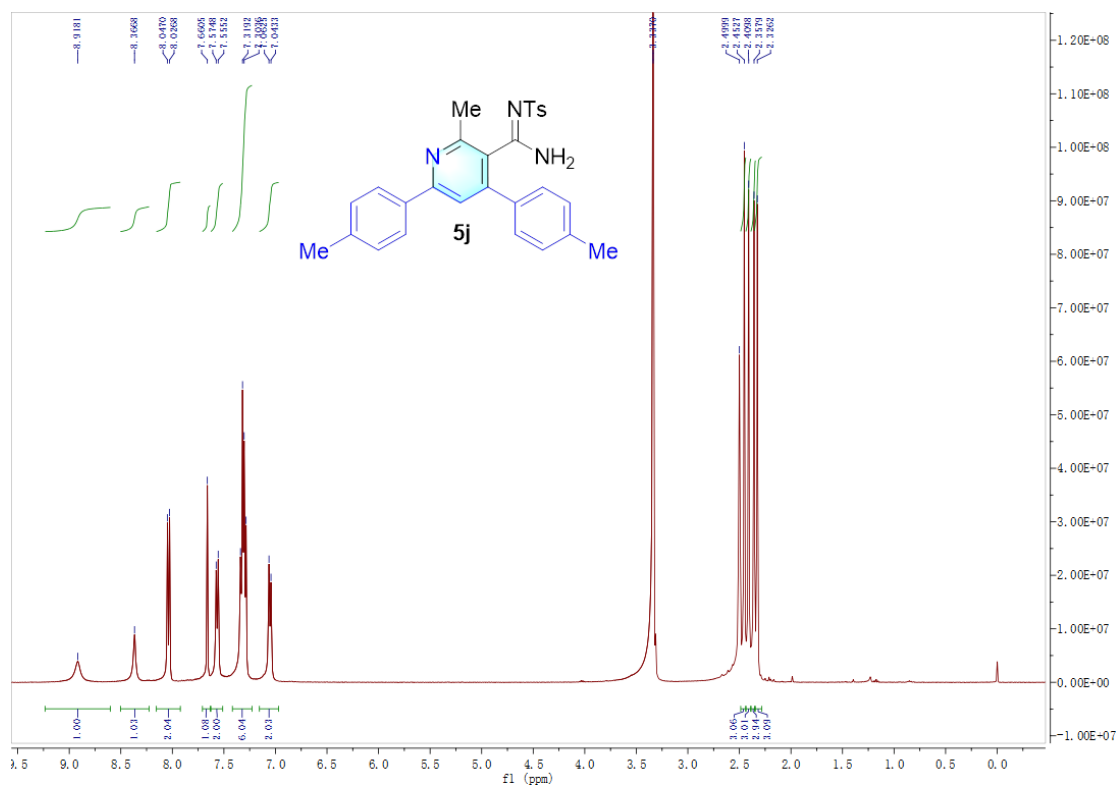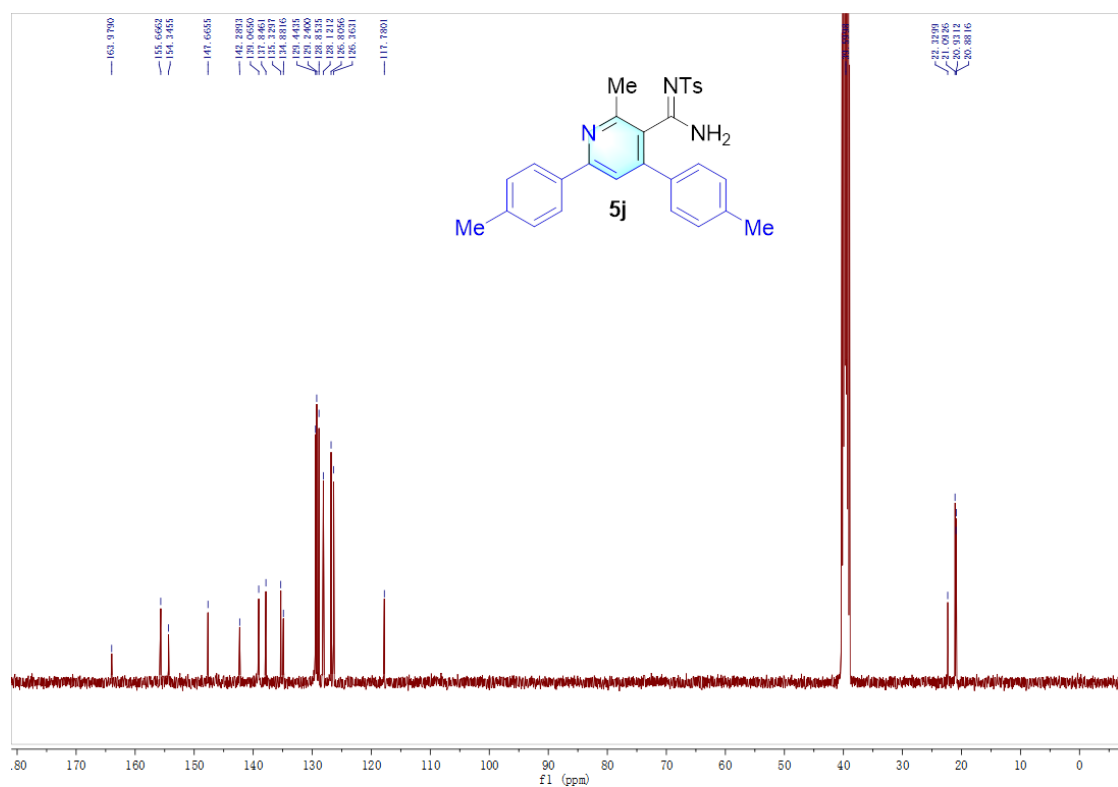

**Figure S11.**  $^1\text{H}$  NMR of **5k** (400 MHz,  $\text{DMSO-}d_6$ ) and  $^{13}\text{C}$  NMR of **5k** (100 MHz,  $\text{DMSO-}d_6$ ).

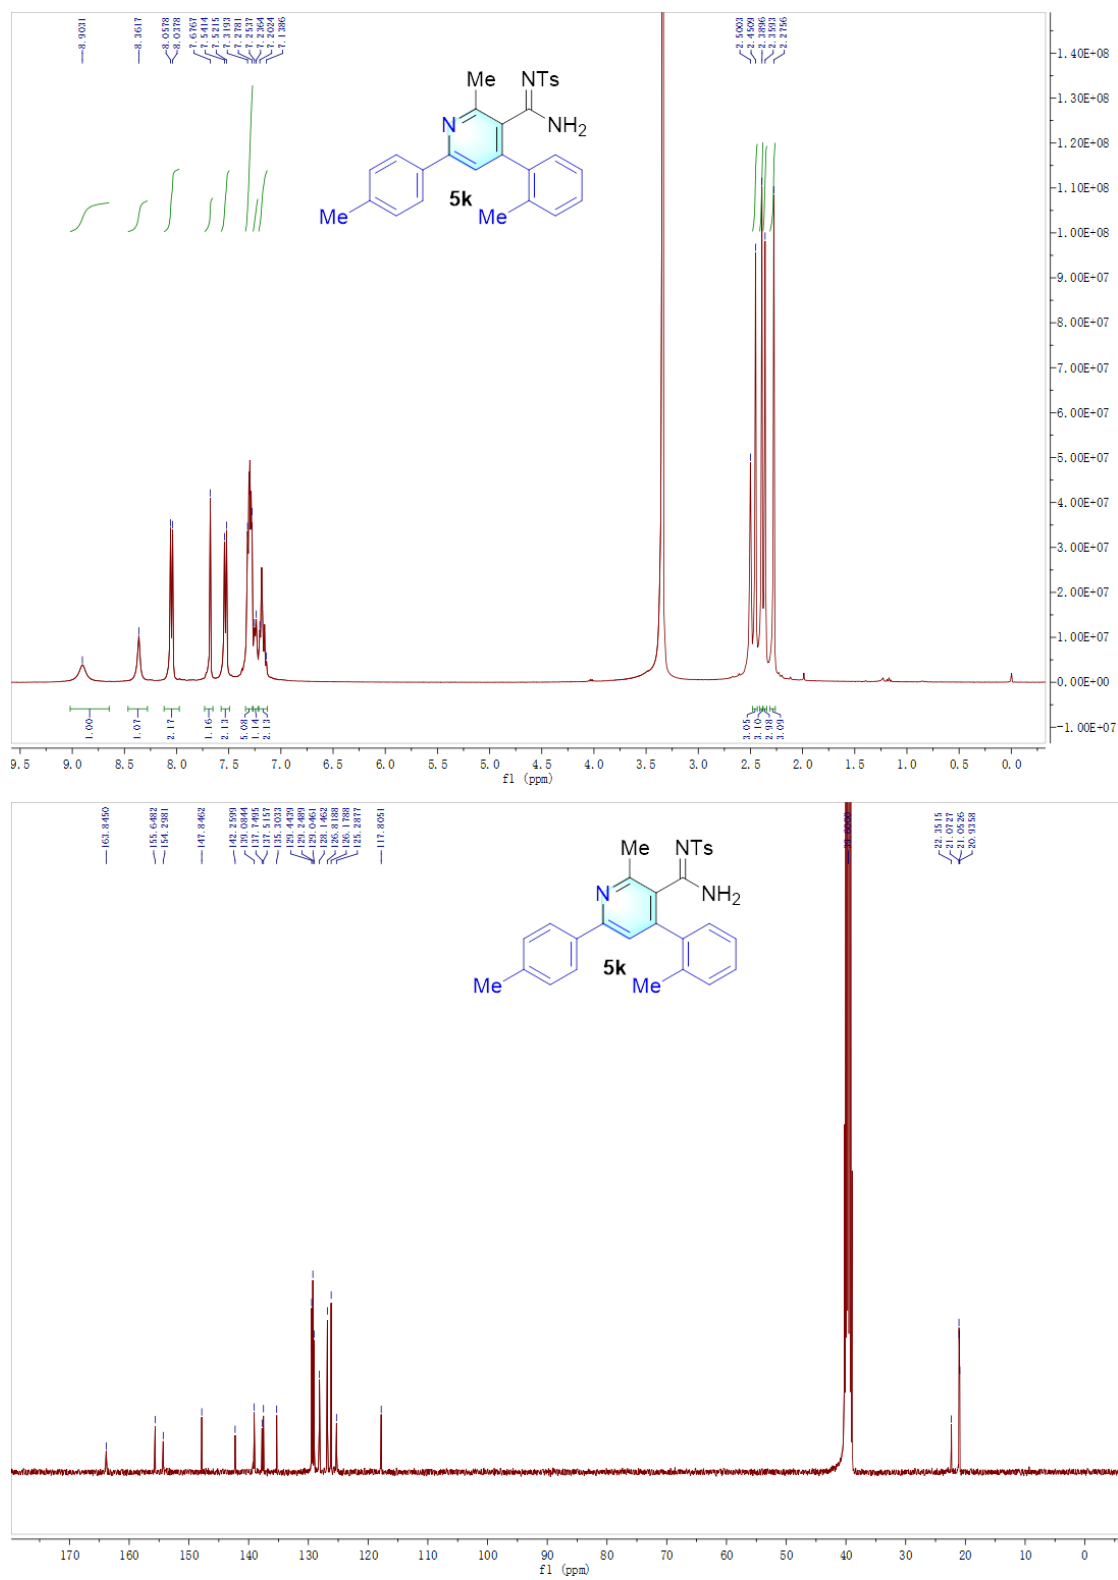

**Figure S12.**  $^1\text{H}$  NMR of **5I** (400 MHz,  $\text{DMSO-}d_6$ ) and  $^{13}\text{C}$  NMR of **5I** (100 MHz,  $\text{DMSO-}d_6$ ).

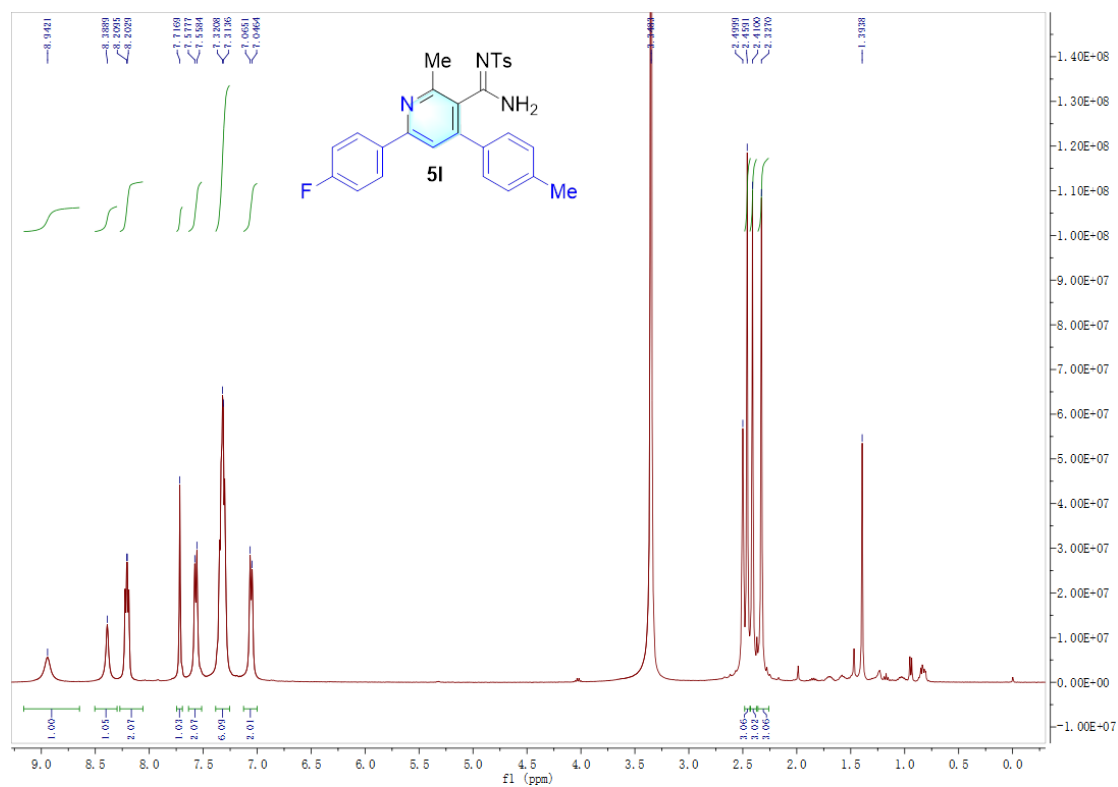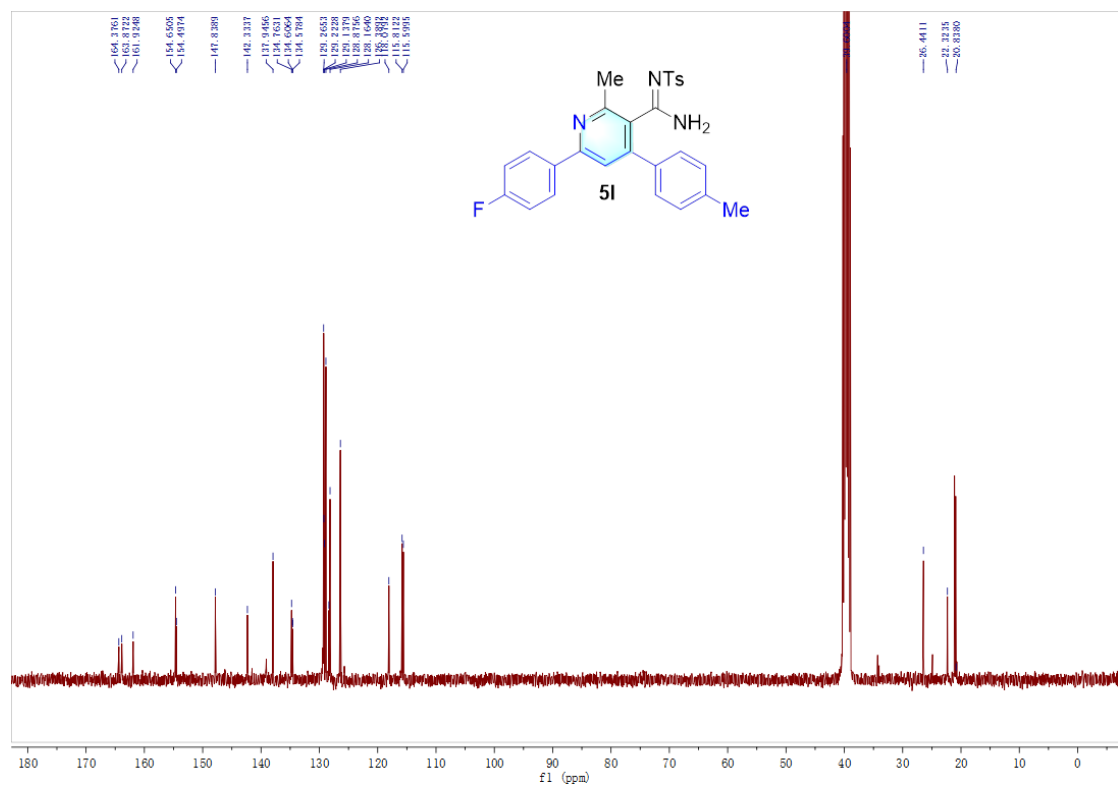

**Figure S13.**  $^1\text{H}$  NMR of **5m** (400 MHz,  $\text{DMSO-}d_6$ ) and  $^{13}\text{C}$  NMR of **5m** (100 MHz,  $\text{DMSO-}d_6$ ).

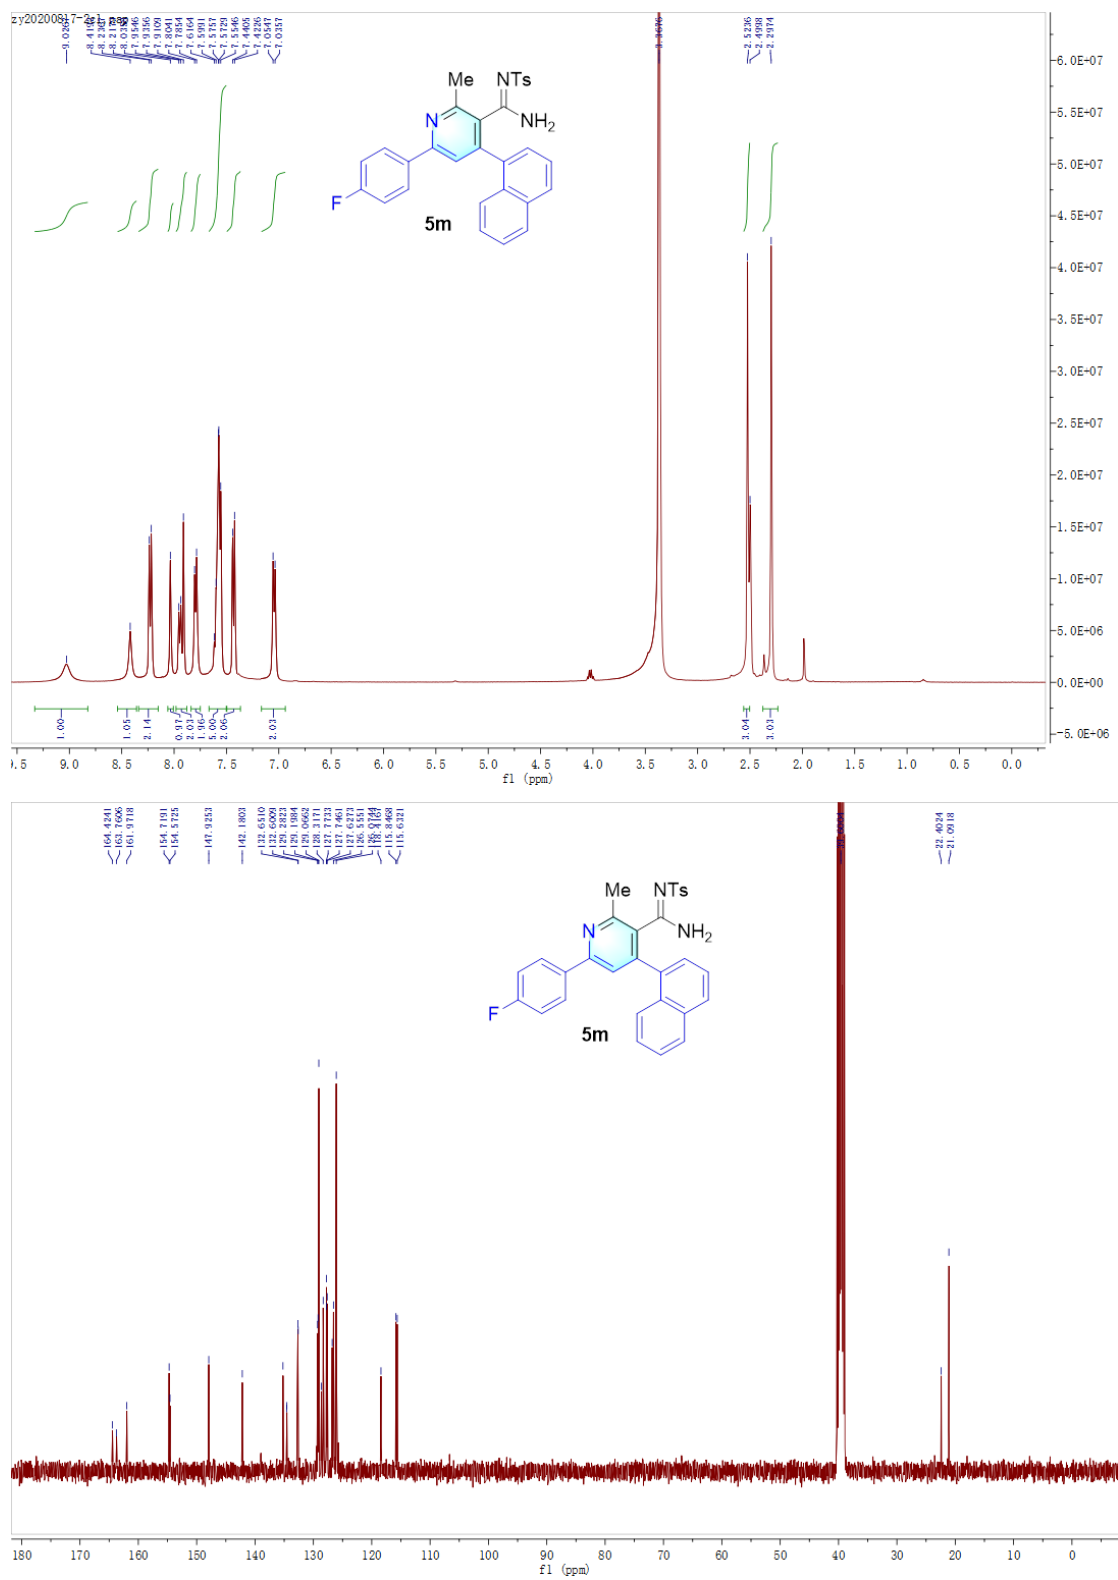



**Figure S14.**  $^1\text{H}$  NMR of **5n** (400 MHz,  $\text{DMSO-}d_6$ ) and  $^{13}\text{C}$  NMR of **5n** (100 MHz,  $\text{DMSO-}d_6$ ).

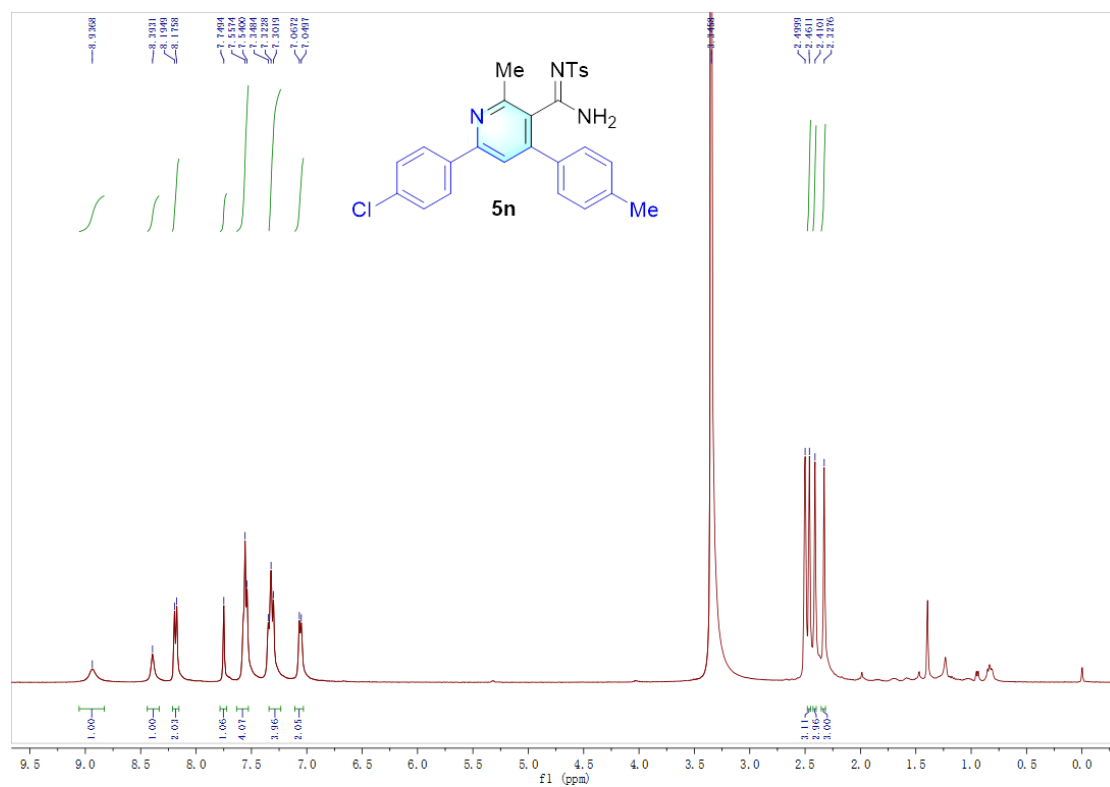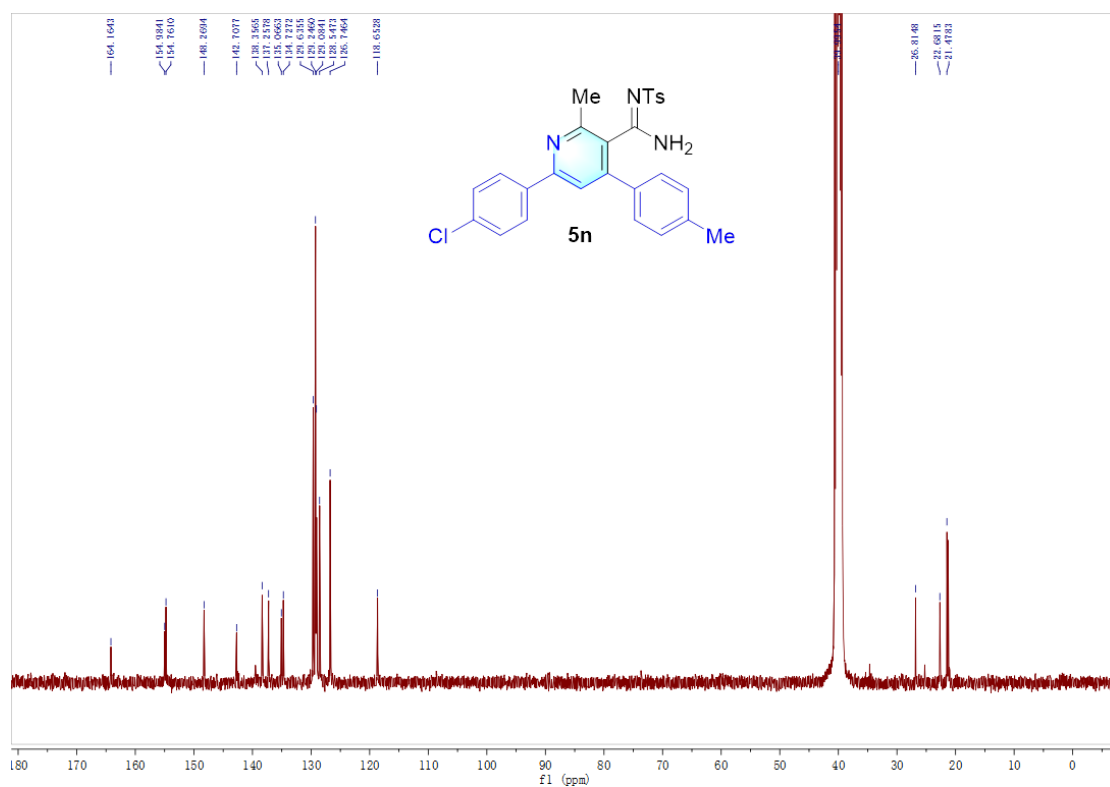

**Figure S15.**  $^1\text{H}$  NMR of **5o** (400 MHz,  $\text{DMSO-}d_6$ ) and  $^{13}\text{C}$  NMR of **5o** (100 MHz,  $\text{DMSO-}d_6$ ).

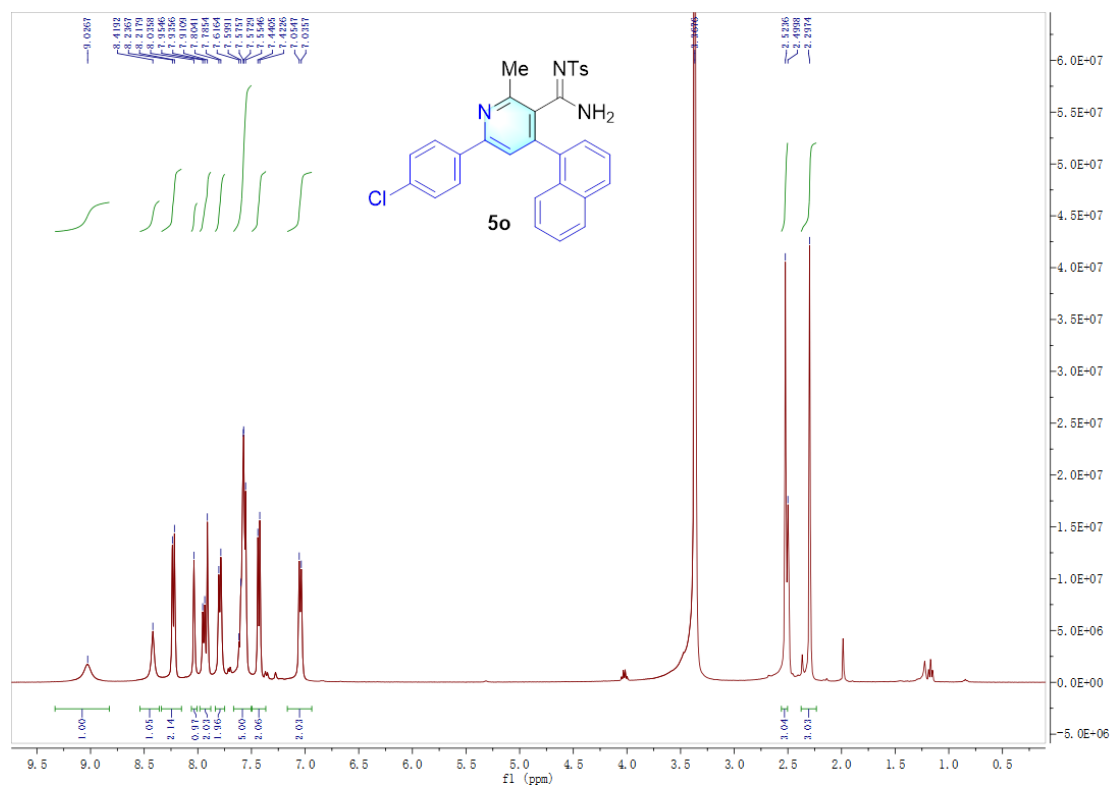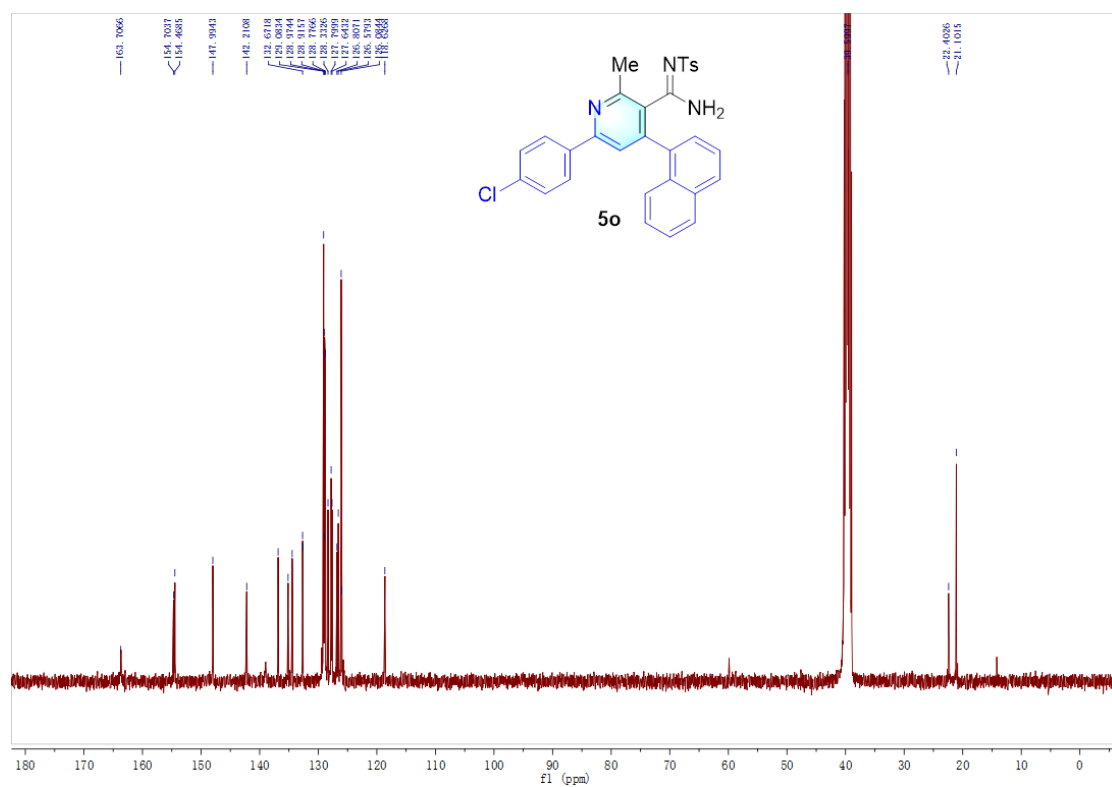

**Figure S16.**  $^1\text{H}$  NMR of **5p** (400 MHz,  $\text{DMSO-}d_6$ ) and  $^{13}\text{C}$  NMR of **5p** (100 MHz,  $\text{DMSO-}d_6$ ).

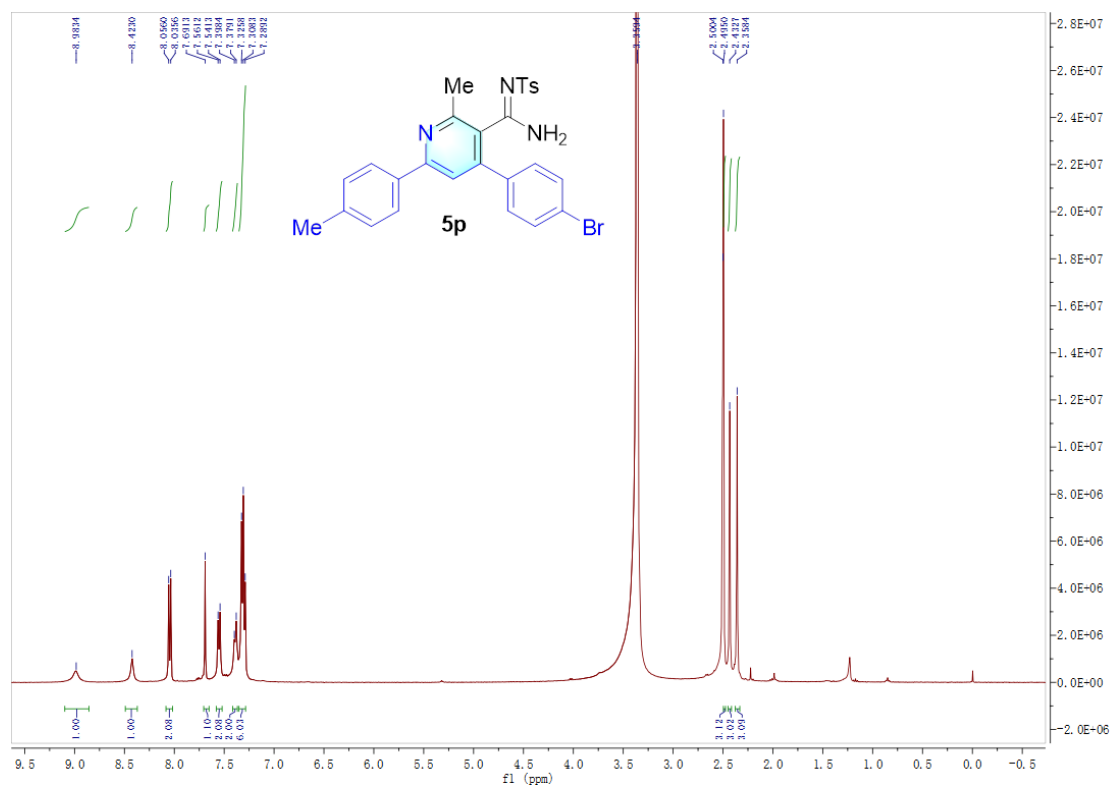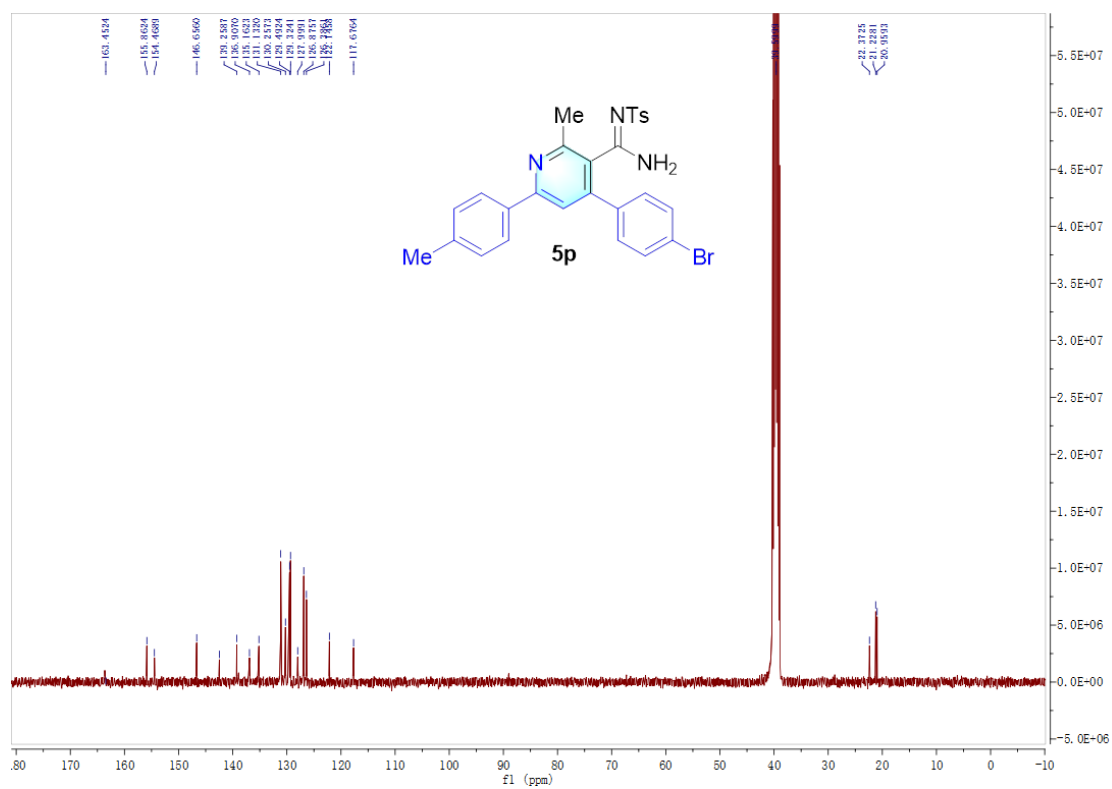

**Figure S17.**  $^1\text{H}$  NMR of **5q** (400 MHz,  $\text{DMSO-}d_6$ ) and  $^{13}\text{C}$  NMR of **5q** (100 MHz,  $\text{DMSO-}d_6$ ).

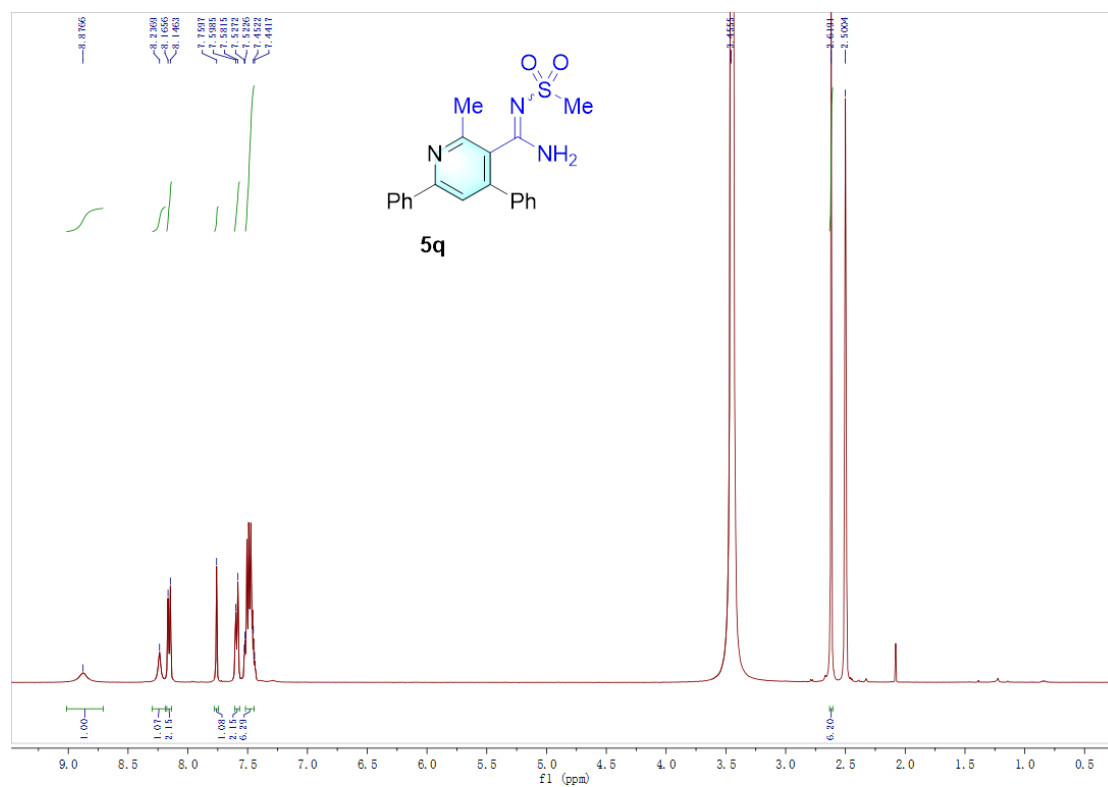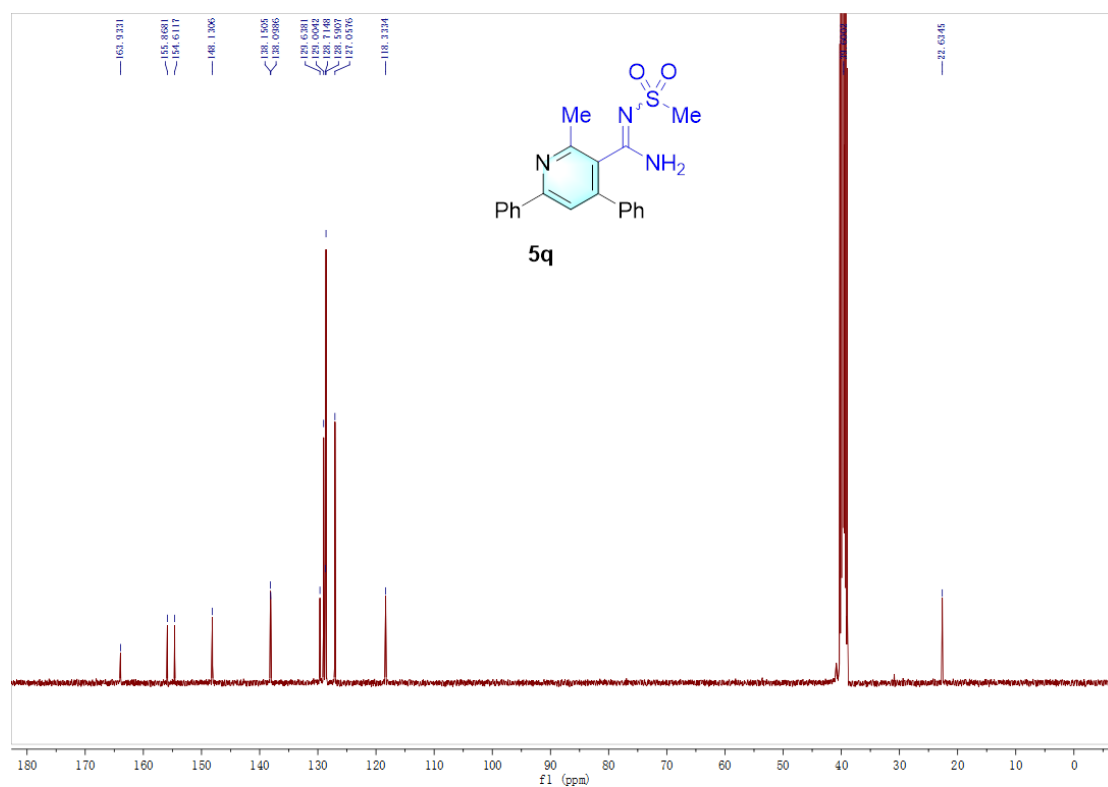

**Figure S18.**  $^1\text{H}$  NMR of **5r** (400 MHz,  $\text{DMSO-}d_6$ ) and  $^{13}\text{C}$  NMR of **5r** (100 MHz,  $\text{DMSO-}d_6$ ).

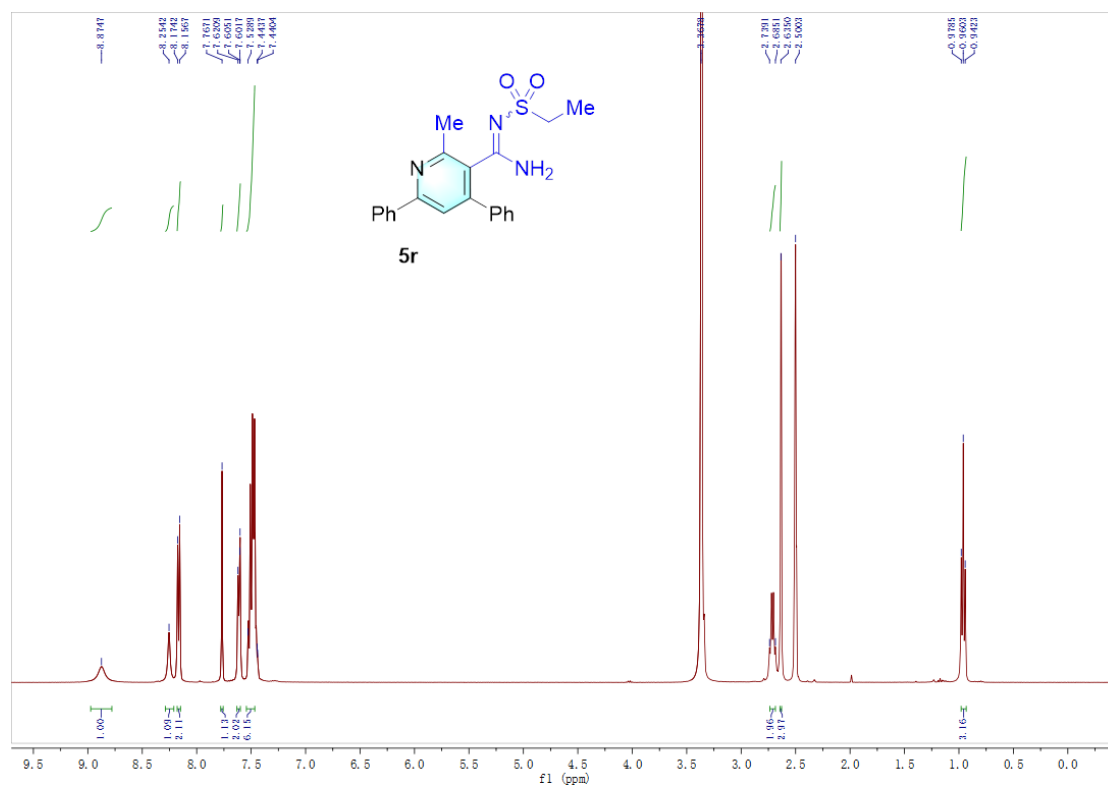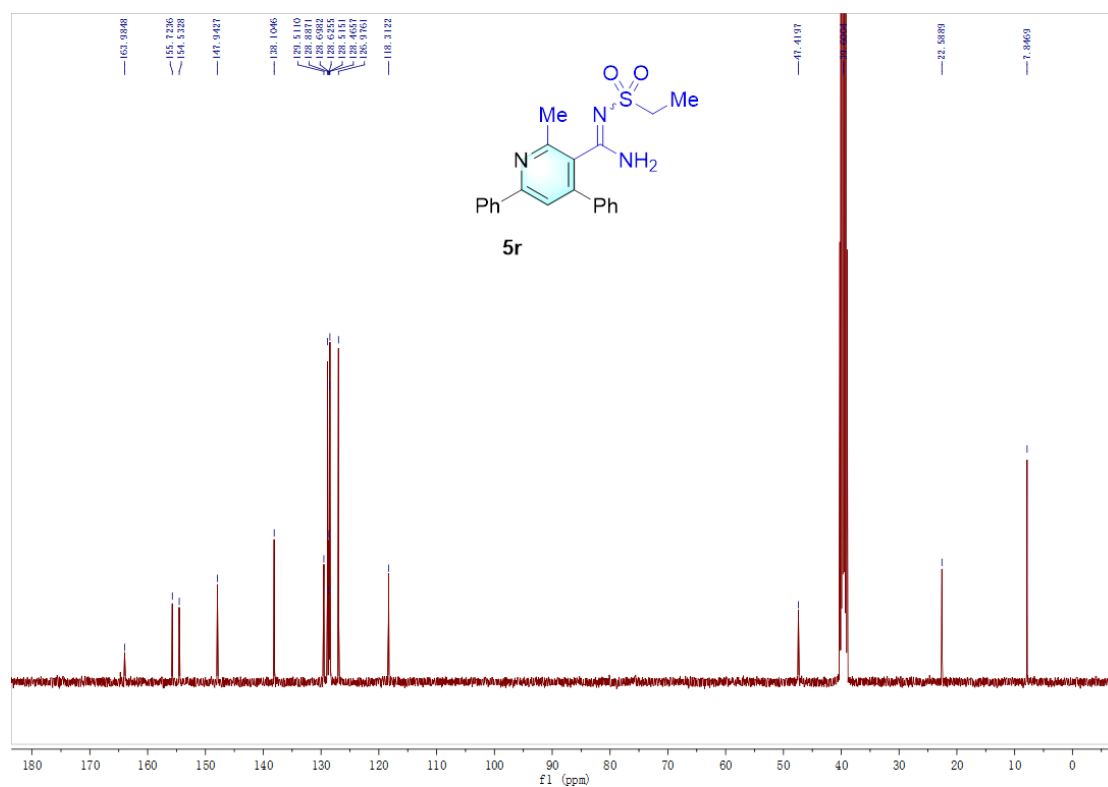

**Figure S19.**  $^1\text{H}$  NMR of **5s** (400 MHz,  $\text{DMSO-}d_6$ ) and  $^{13}\text{C}$  NMR of **5s** (100 MHz,  $\text{DMSO-}d_6$ ).

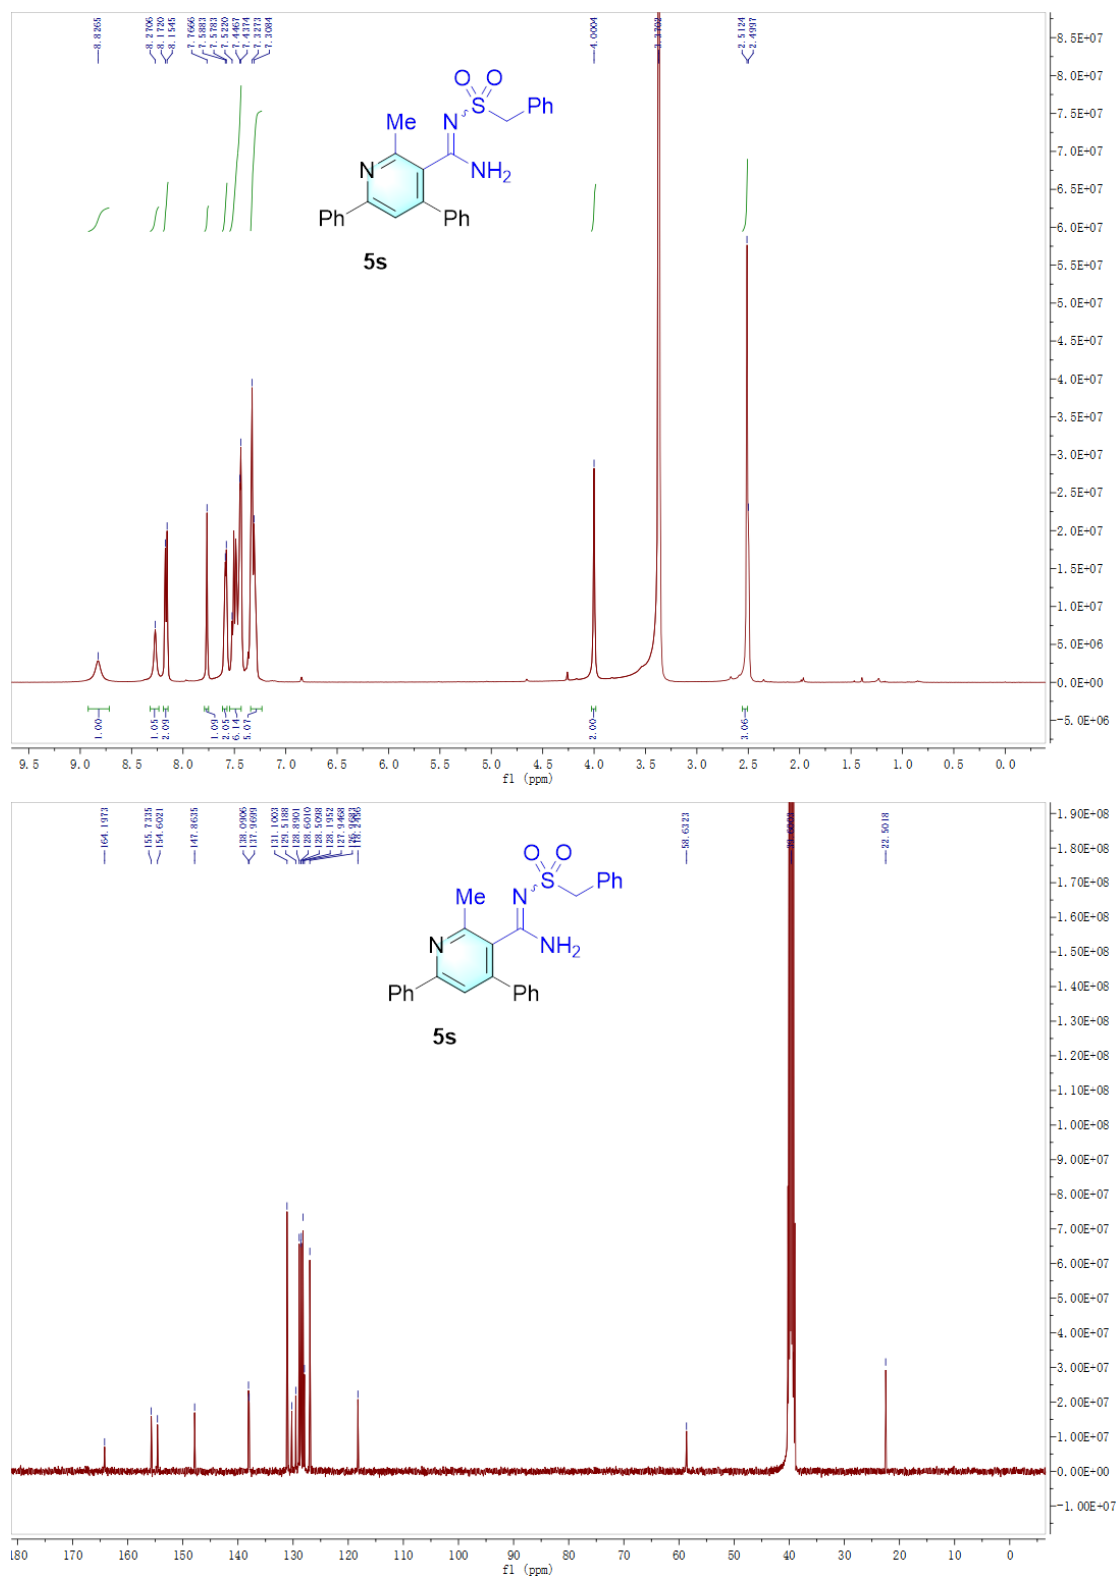

**Figure S20.**  $^1\text{H}$  NMR of **5t** (400 MHz,  $\text{DMSO-}d_6$ ) and  $^{13}\text{C}$  NMR of **5t** (100 MHz,  $\text{DMSO-}d_6$ ).

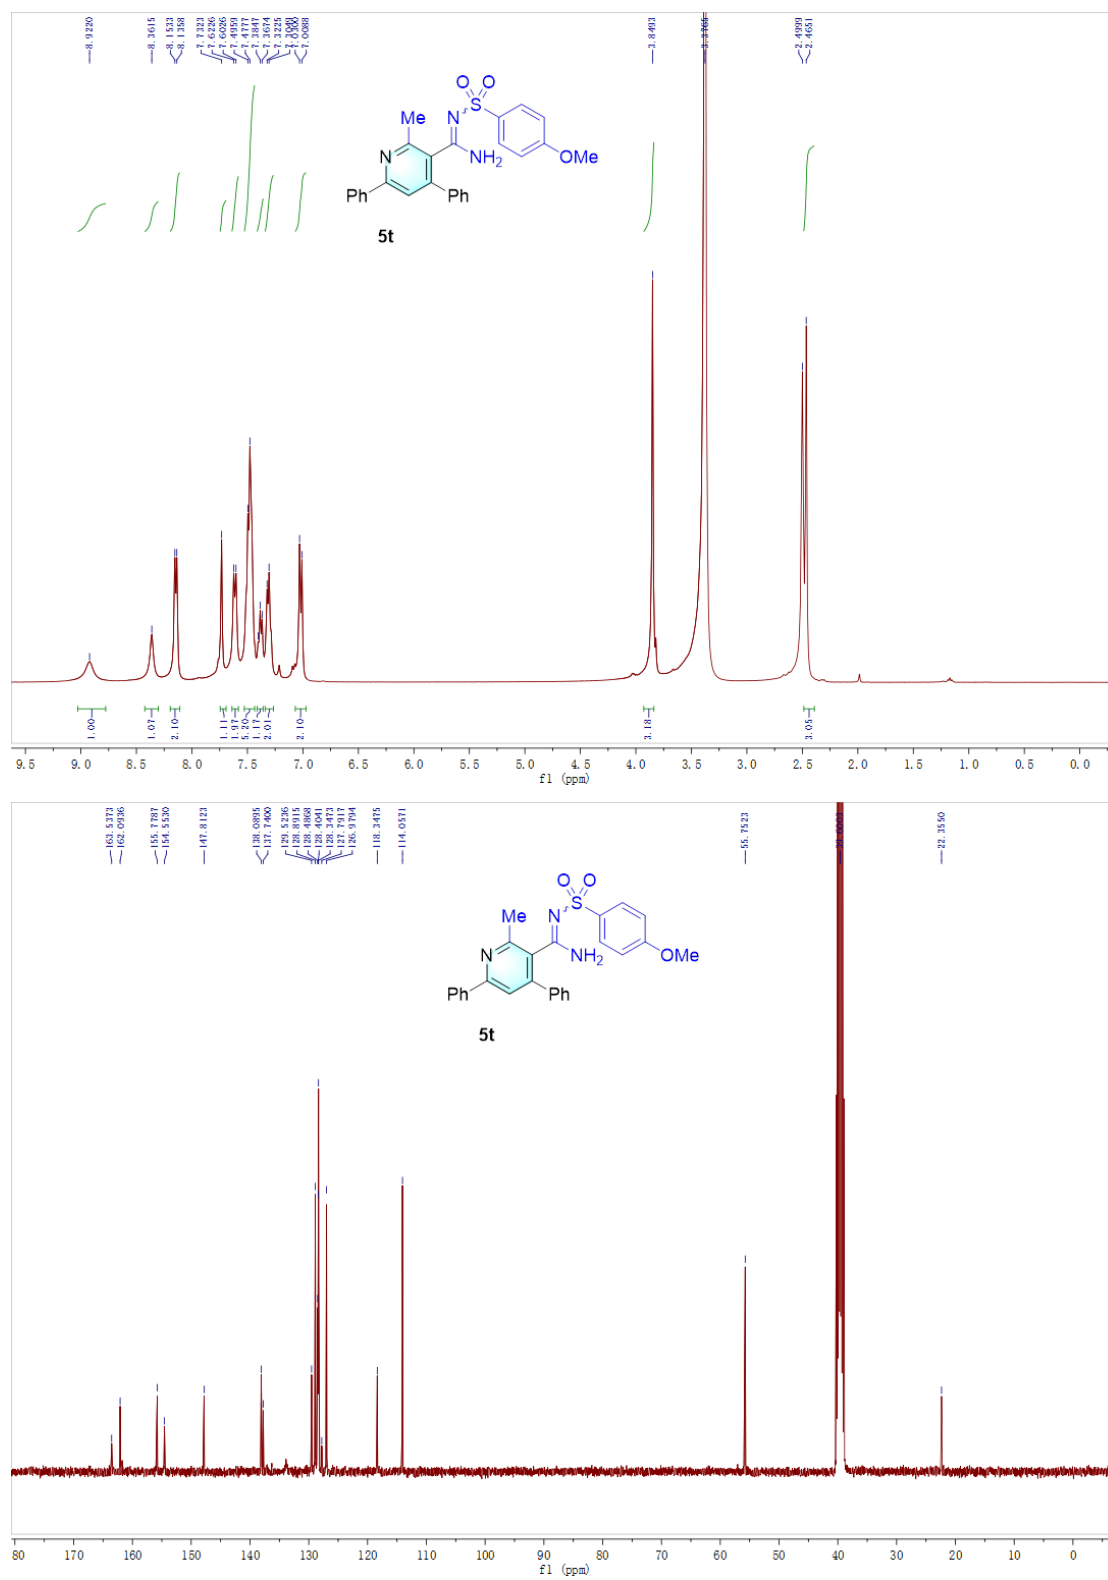

**Figure S21.**  $^1\text{H}$  NMR of **5u** (400 MHz,  $\text{DMSO-}d_6$ ) and  $^{13}\text{C}$  NMR of **5u** (100 MHz,  $\text{DMSO-}d_6$ ).

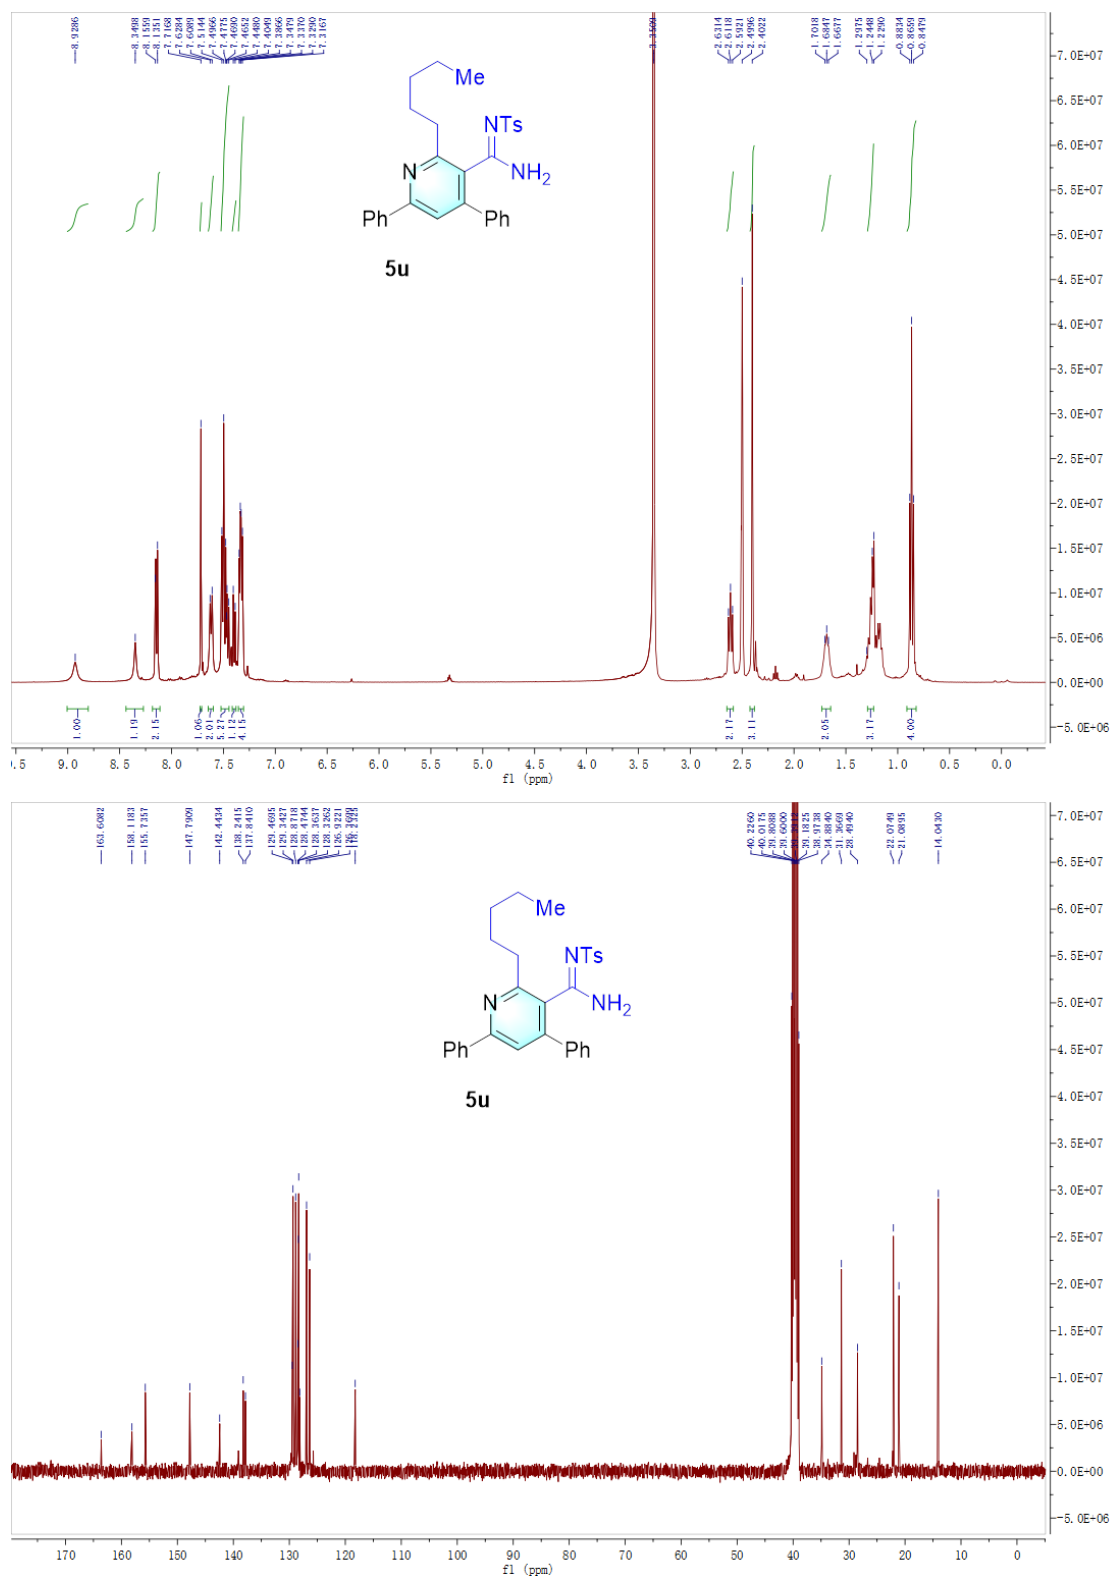



**Figure S22.**  $^1\text{H}$  NMR of **6** (400 MHz,  $\text{DMSO-}d_6$ ) and  $^{13}\text{C}$  NMR of **6** (100 MHz,  $\text{DMSO-}d_6$ ).

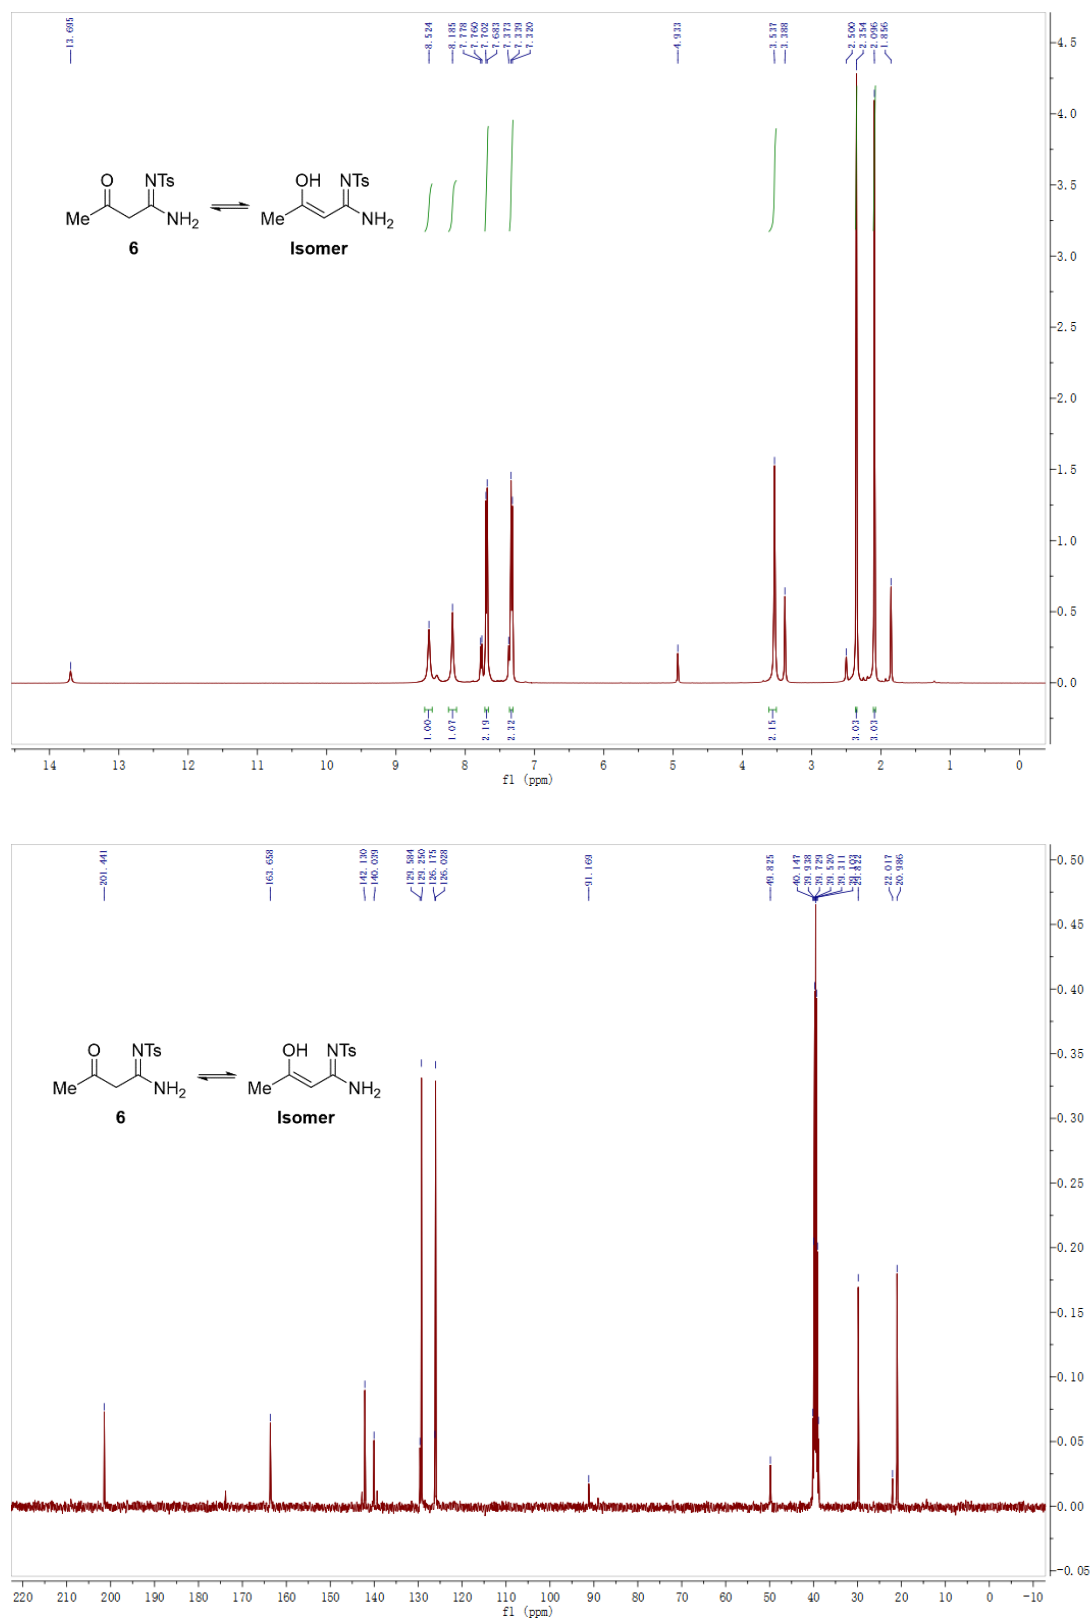

Supplement: d4ra04918g1.pdf [file d4ra04918g1.pdf]
